# Supplementary material for: Distinct Features and Functions of Systemic and Mucosal Humoral Immunity Among SARS-CoV-2 Convalescent Individuals
Source: PubMed Central journal article supplement (PMC7876222; doi:10.3389/fimmu.2020.618685), 2021-01-28
Supplement: DataSheet_1.pdf [file DataSheet_1.pdf]

## Supplementary Materials

| <b>Supplementary Figures</b> |                                                                                                          |
|------------------------------|----------------------------------------------------------------------------------------------------------|
| Supplementary Figure 1       | Serum IgG isotype and subclass responses across CoV and control antigen types.                           |
| Supplementary Figure 2       | Serum IgA, D, and M isotype and subclass responses across CoV and control antigen types.                 |
| Supplementary Figure 3       | Serum Fc $\gamma$ R binding responses across antibodies specific to CoV and control antigen types.       |
| Supplementary Figure 4       | Nasal IgG isotype and subclass responses across CoV and control antigen types.                           |
| Supplementary Figure 5       | Nasal IgA, D, and M isotype and subclass responses across CoV and control antigen types.                 |
| Supplementary Figure 6       | Nasal Fc $\gamma$ R binding responses across antibodies specific to CoV and control antigen types.       |
| Supplementary Figure 7       | Stool IgA and IgG responses across CoV and control antigen types                                         |
| Supplementary Figure 8       | Differences in Ab responses observed between naïve and convalescent donors                               |
| Supplementary Figure 9       | Correlations between Ab features within serum and nasal wash samples                                     |
| Supplementary Figure 10      | Differences in Ab responses among convalescent donors by subject characteristics                         |
| Supplementary Figure 11      | Heatmap of serum Ab features that differ between donors who experienced severe versus non-severe disease |
| Supplementary Figure 12      | Impact of isotype depletion on nasal wash neutralization and phagocytosis                                |
| <b>Supplementary Tables</b>  |                                                                                                          |
| Supplementary Table 1        | Demographic data for convalescent and naive donors                                                       |
| Supplementary Table 2        | Fc Array Reagents                                                                                        |
| Supplementary Table 3        | CoV Antigen Sequences                                                                                    |

|                       |                                        |
|-----------------------|----------------------------------------|
| Supplementary Table 4 | Sample Dilutions in the Fc Array Assay |
|-----------------------|----------------------------------------|

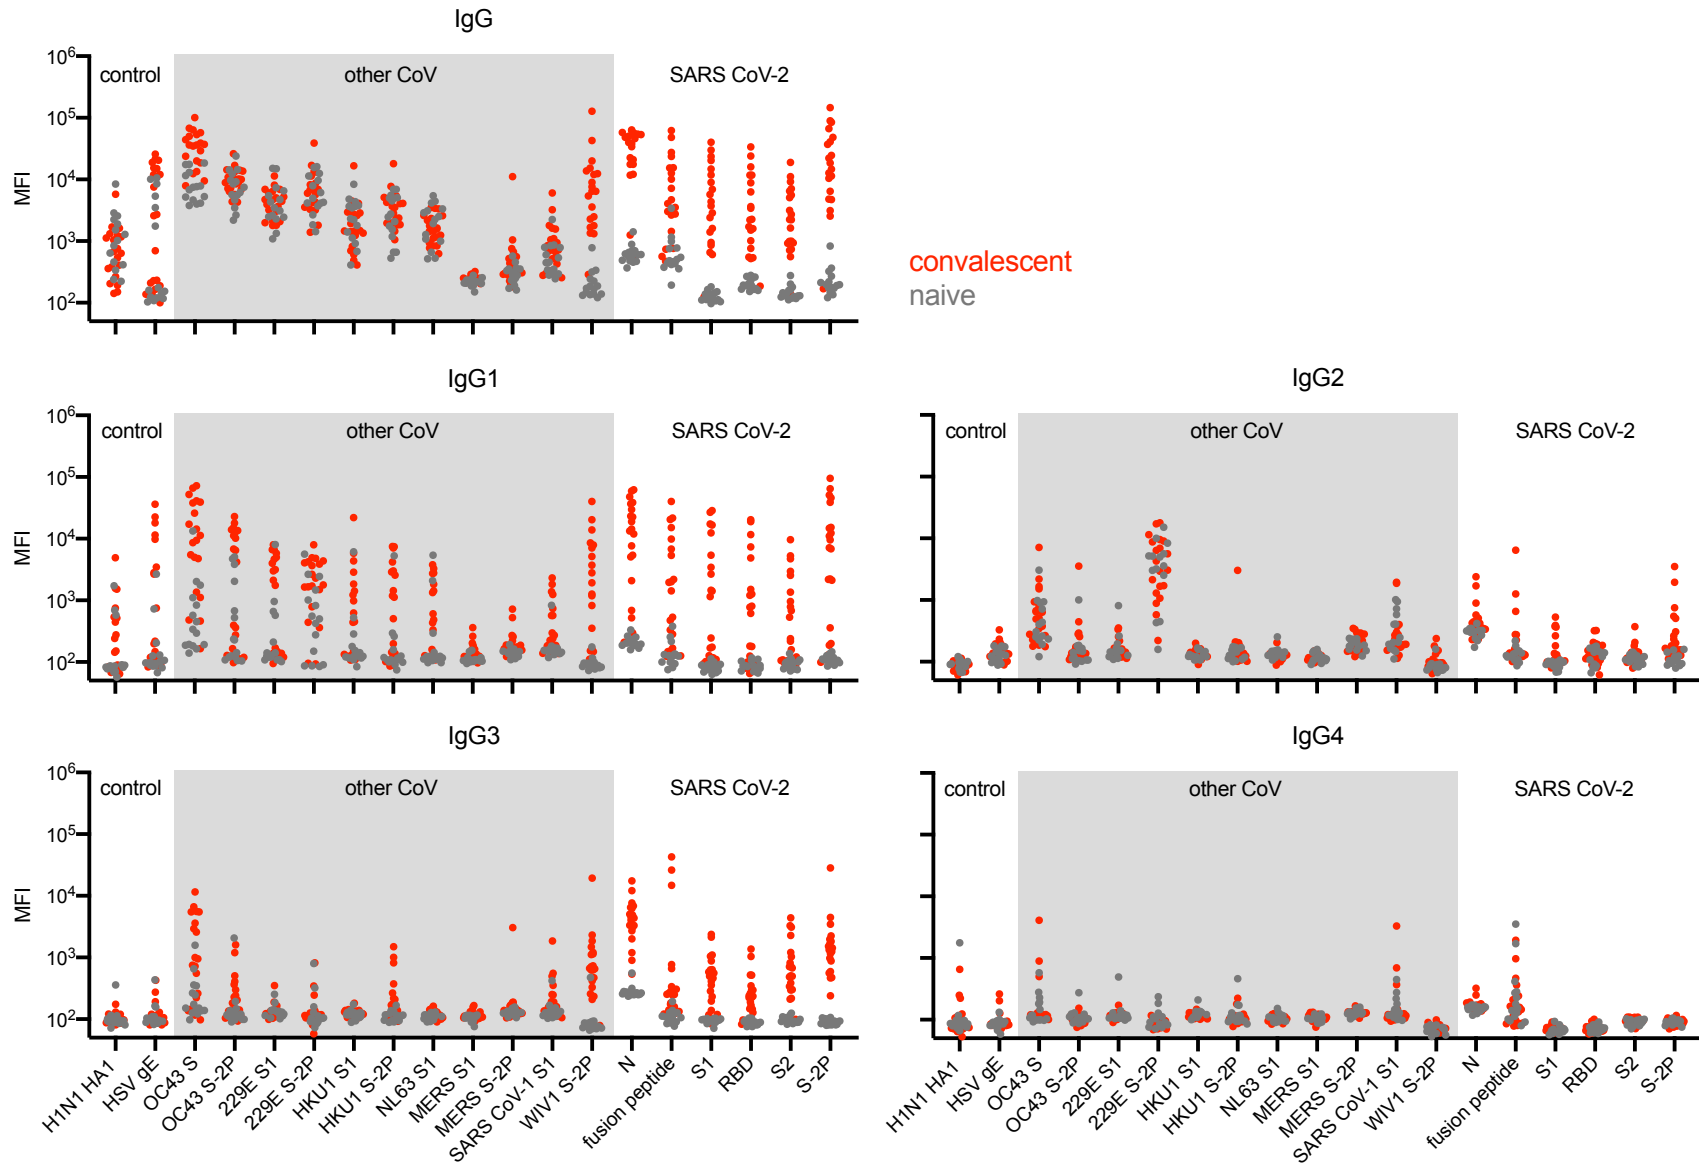

**Supplementary Figure 1.** Serum IgG isotype and subclass responses across CoV and control antigen types.

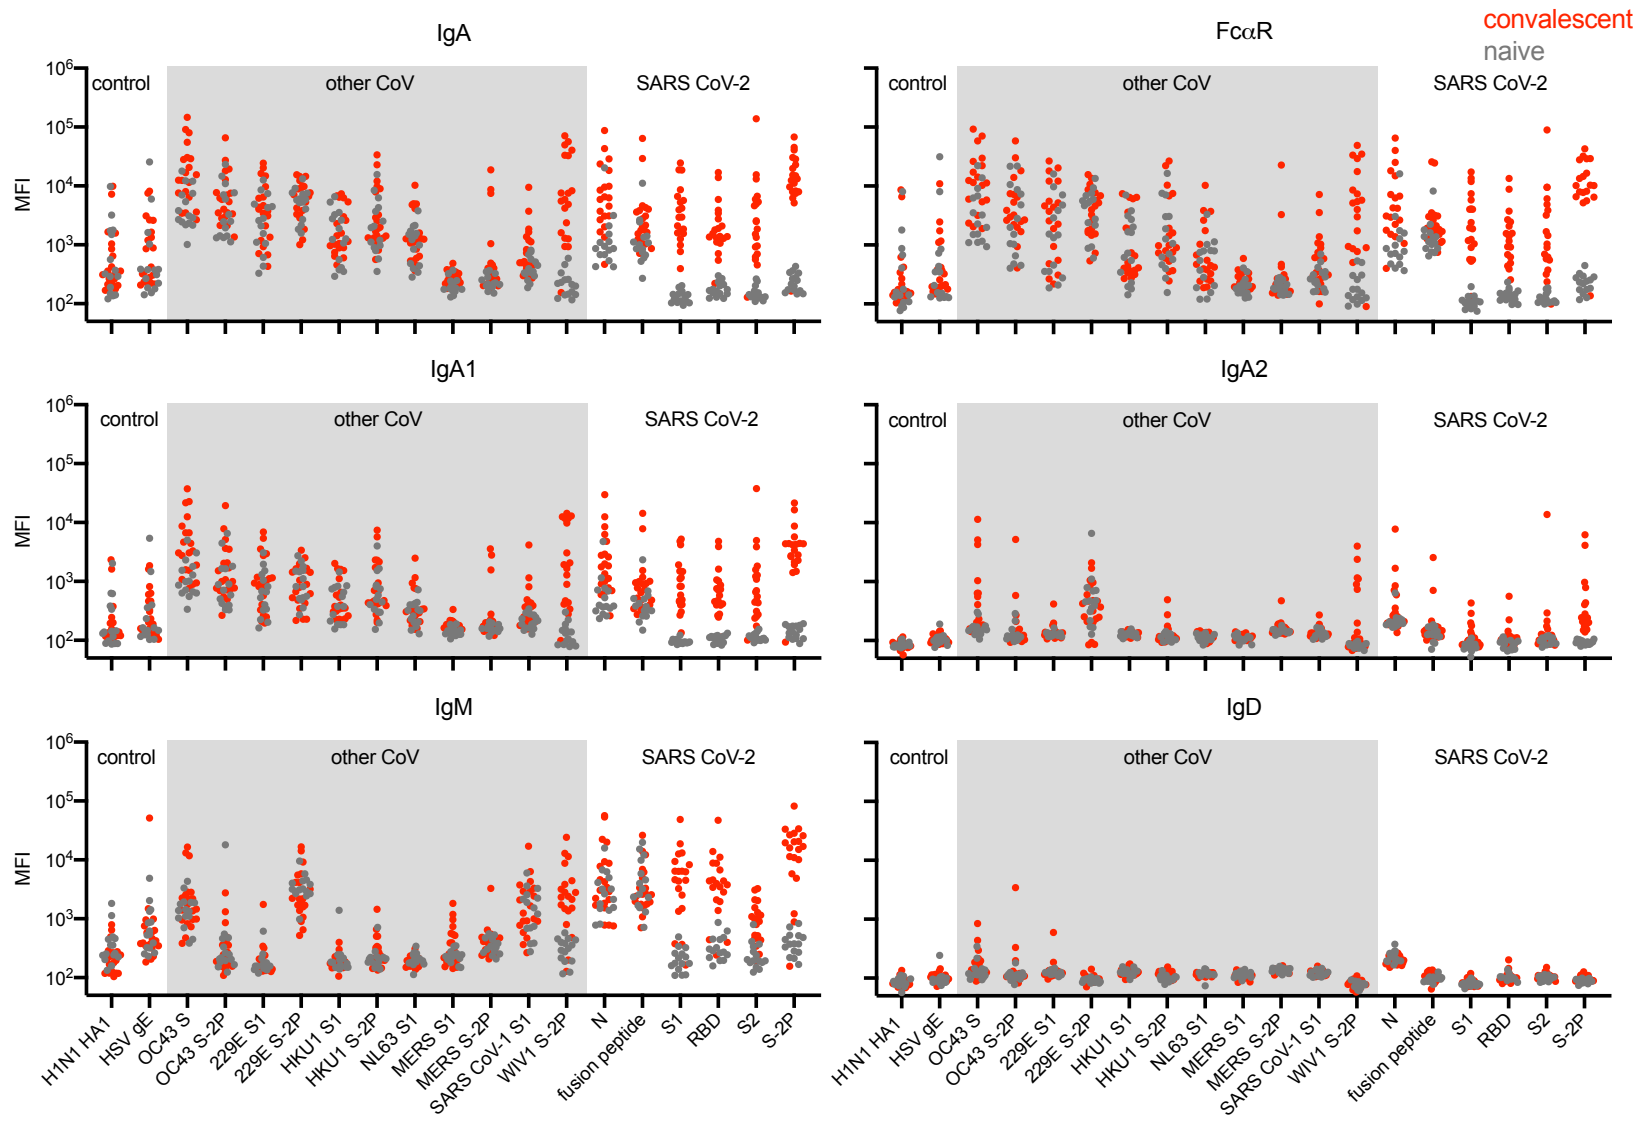

**Supplementary Figure 2.** Serum IgA, D, and M isotype and subclass responses across CoV and control antigen types.

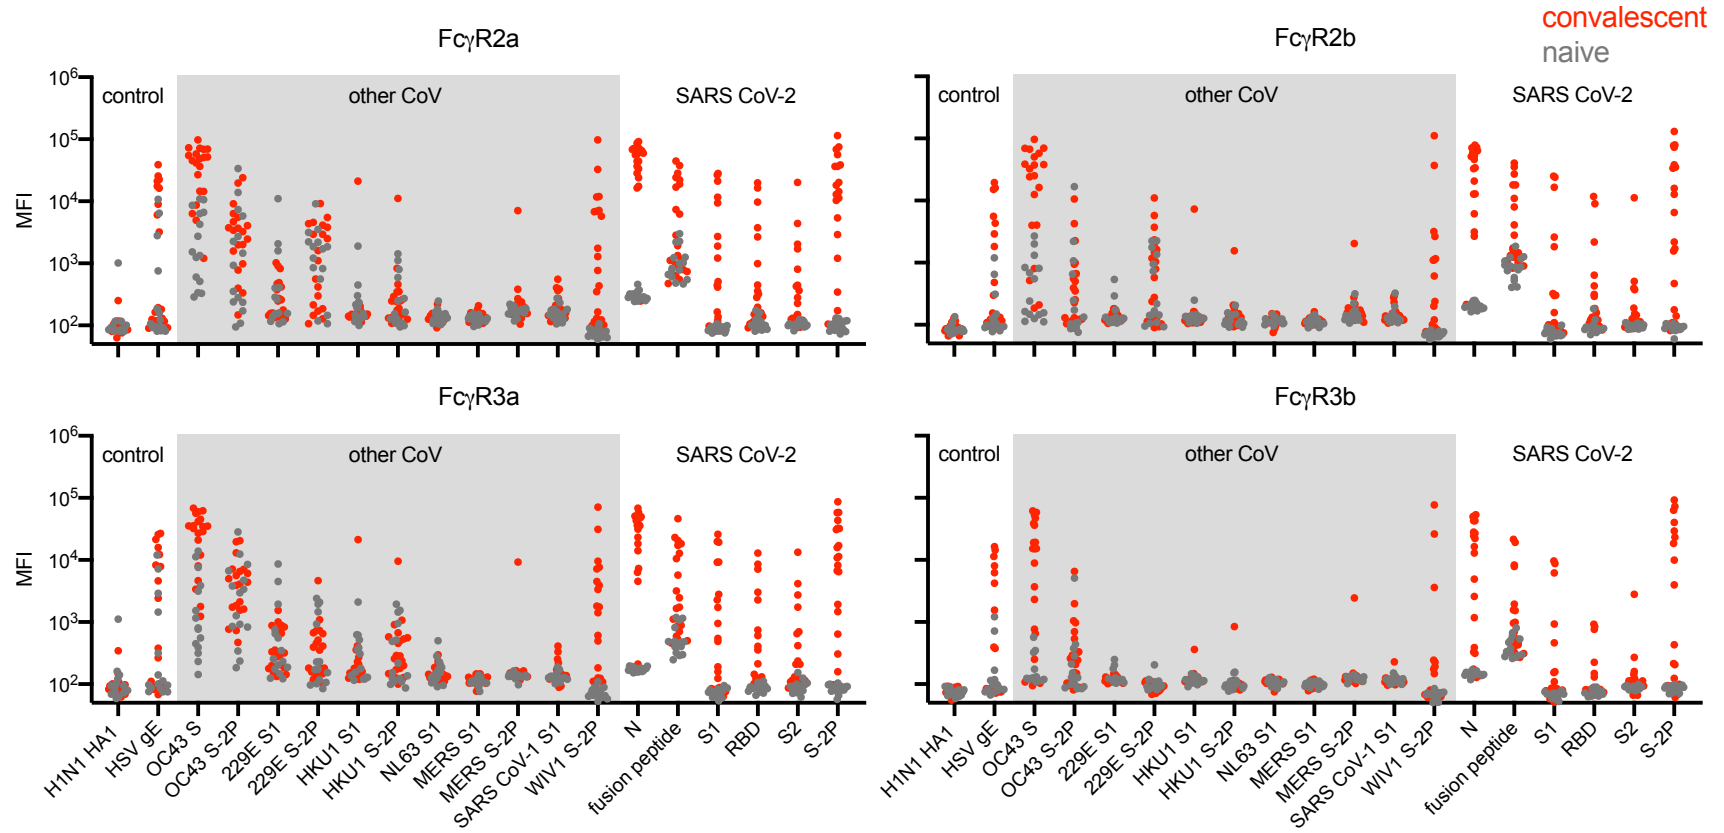

**Supplementary Figure 3.** Serum Fc $\gamma$ R binding responses across antibodies specific to CoV and control antigen types.

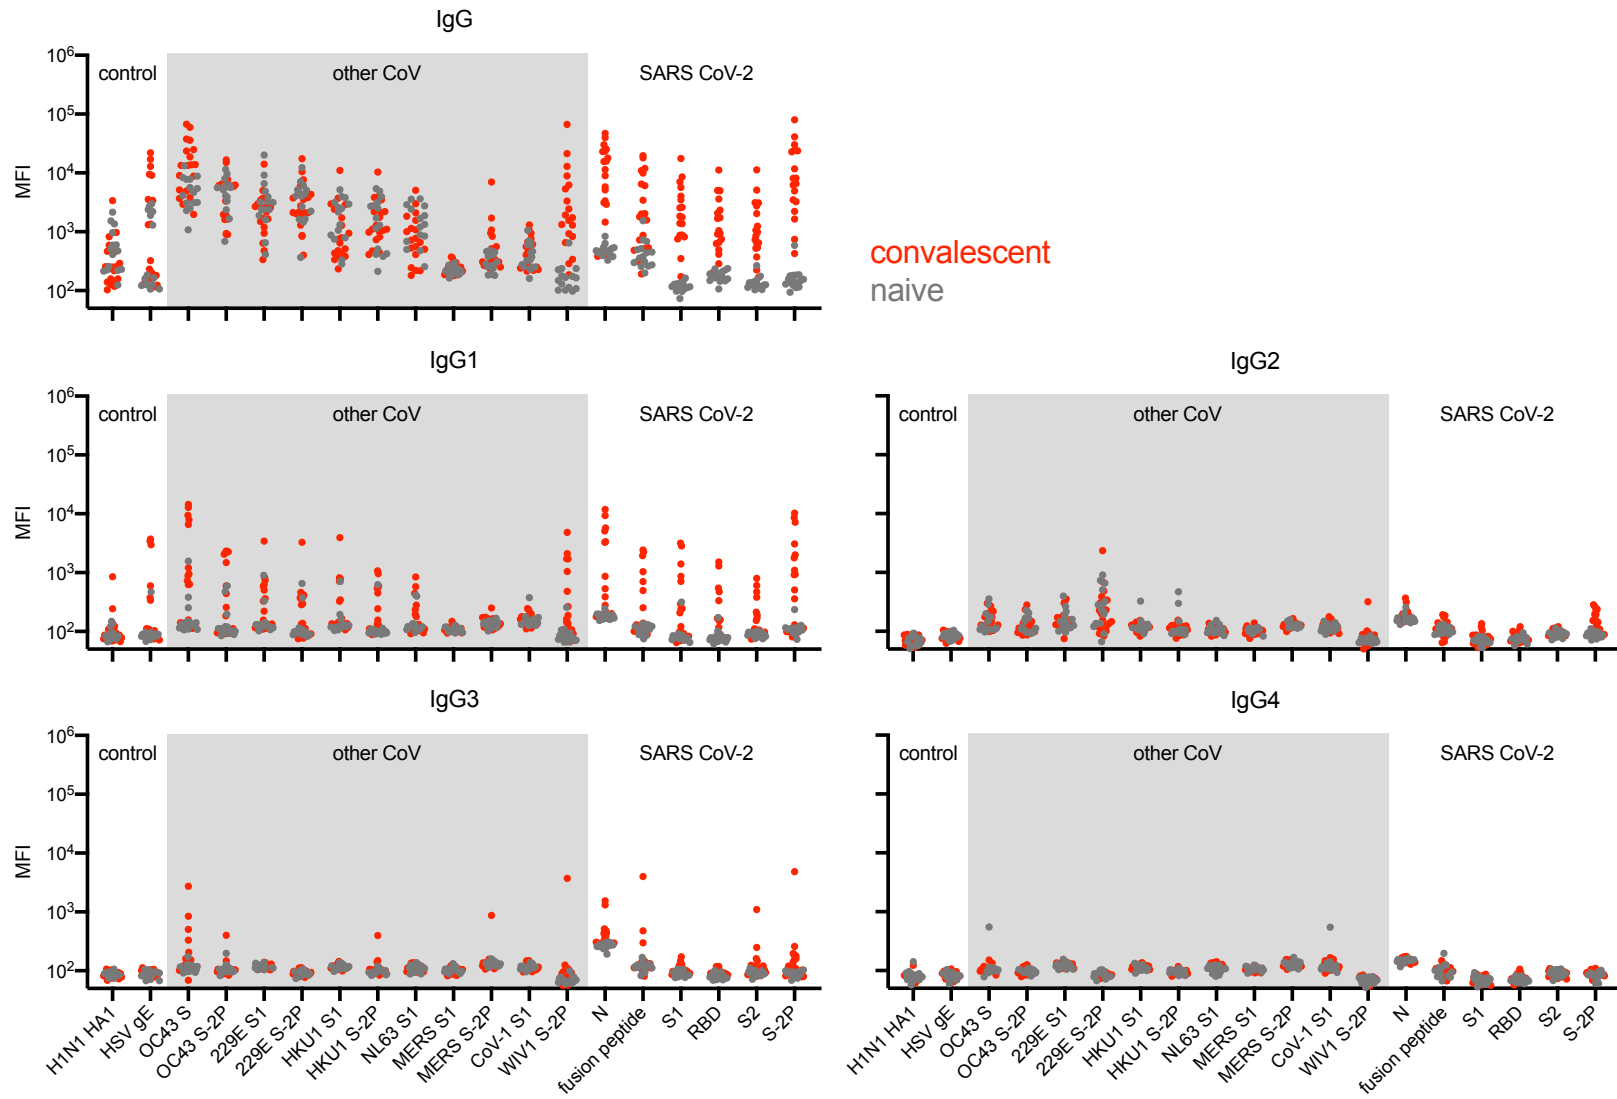

**Supplementary Figure 4.** Nasal IgG isotype and subclass responses across CoV and control antigen types.

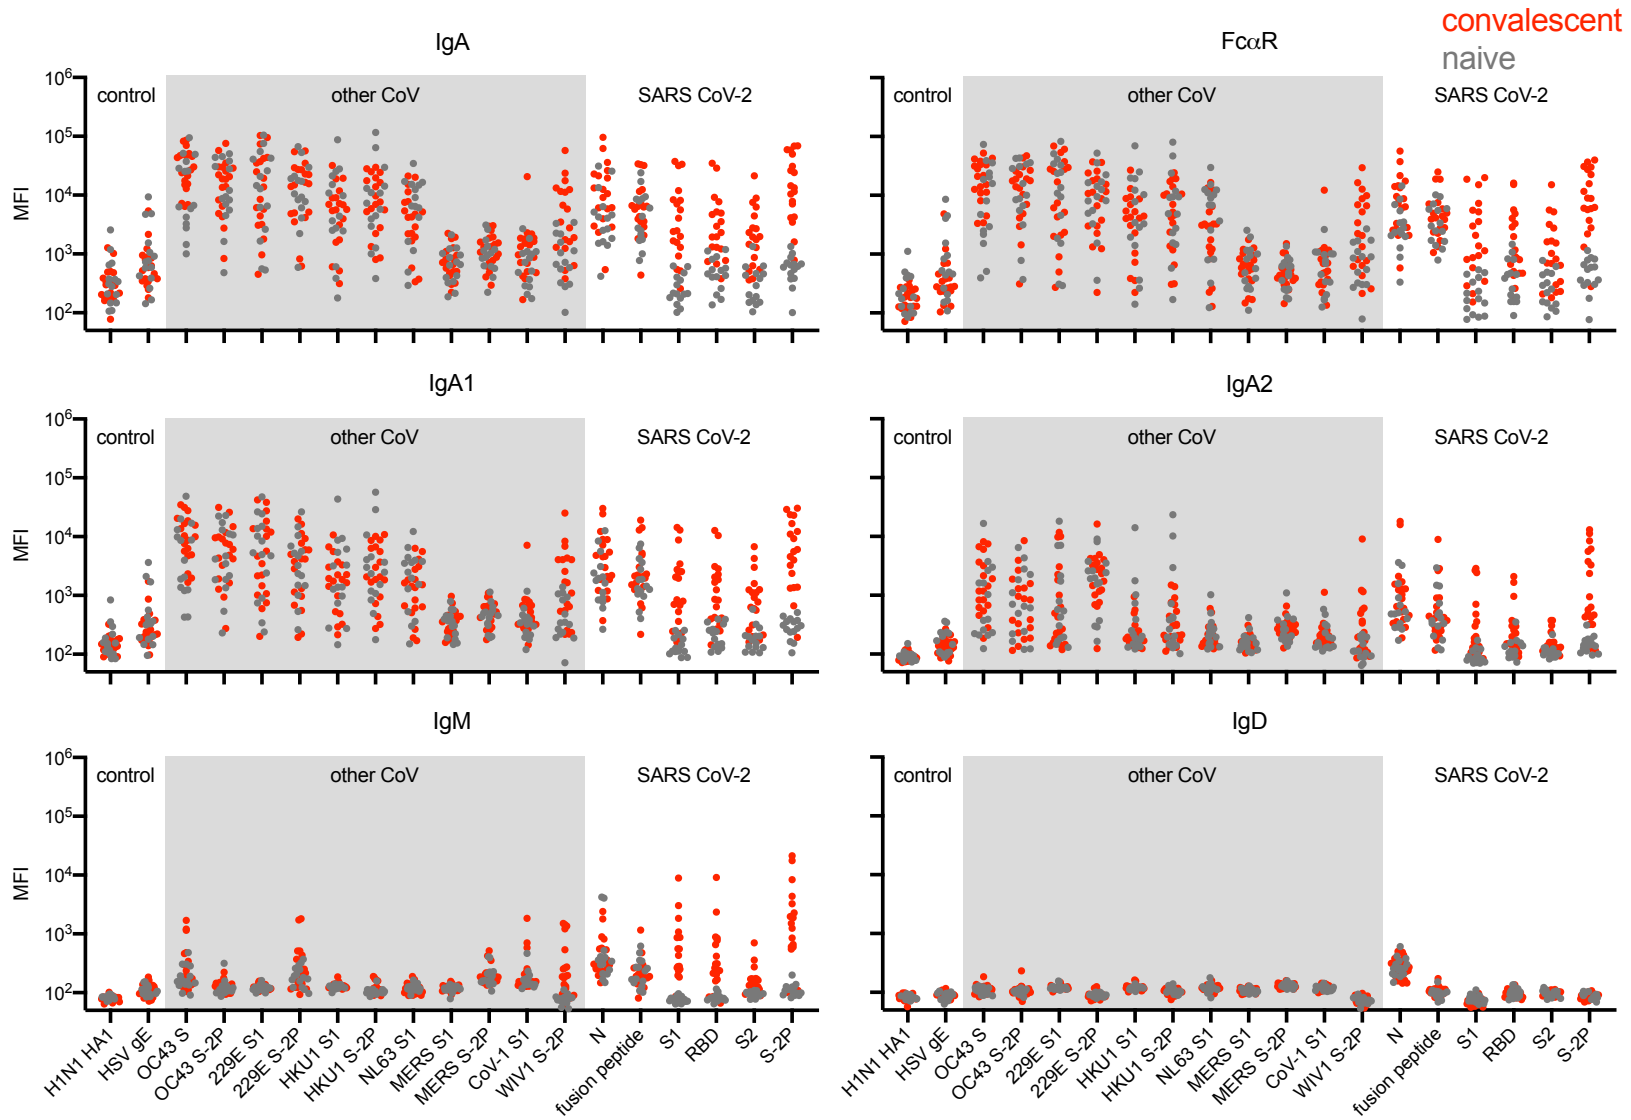

**Supplementary Figure 5.** Nasal IgA, D, and M isotype and subclass responses across CoV and control antigen types.

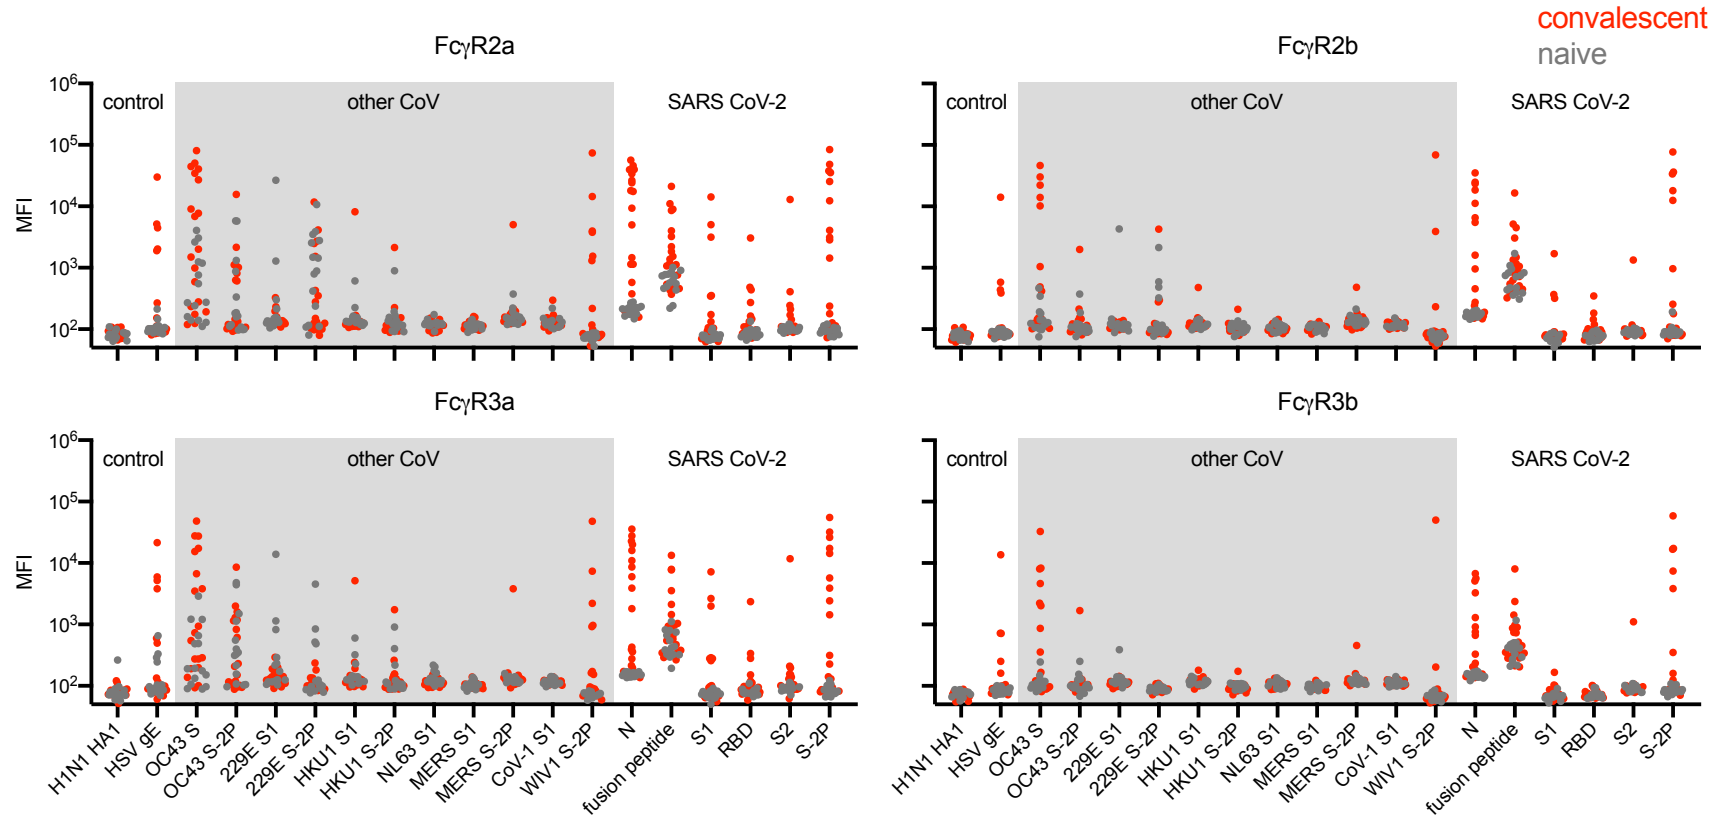

**Supplementary Figure 6.** Nasal FcγR binding responses across antibodies specific to CoV and control antigen types.



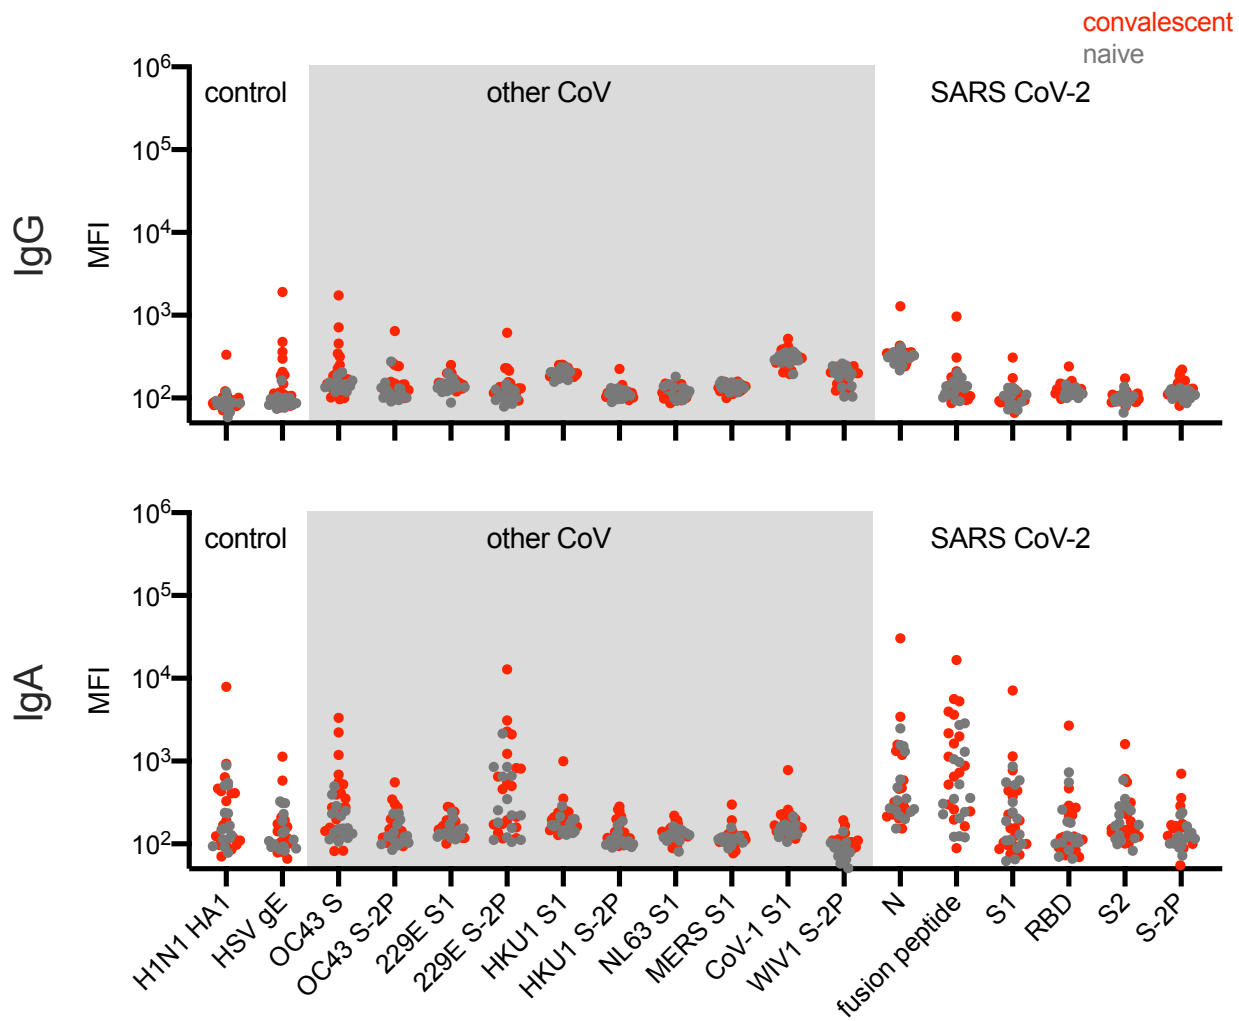

**Supplementary Figure 7.** Stool IgG and IgA responses across CoV and control antigen types.

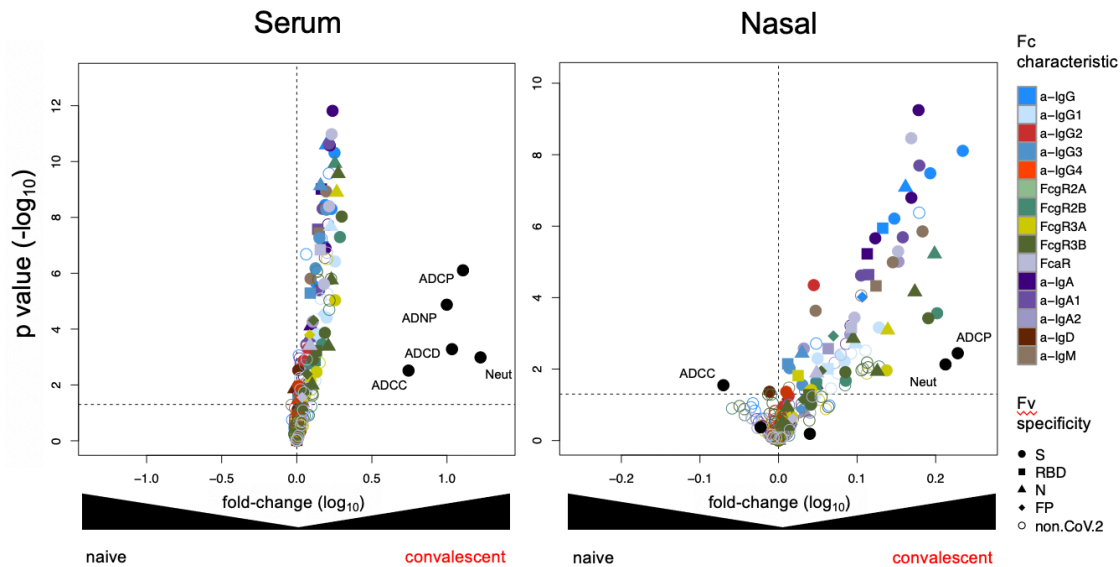

**Supplementary Figure 8. Differences in Ab responses observed between naïve and convalescent donors.** Volcano plots depicting fold-change and unadjusted statistical significance (unpaired two-tailed t test with Welch's correction) of biophysical and functional response features in serum (left) and nasal wash (right) samples by infection status. Functional assay data is labeled by name and log-transformed Fc array data is depicted with antigen specificity indicated by shape and Fc characteristic indicated by color. Dotted horizontal line indicates  $p = 0.05$ .

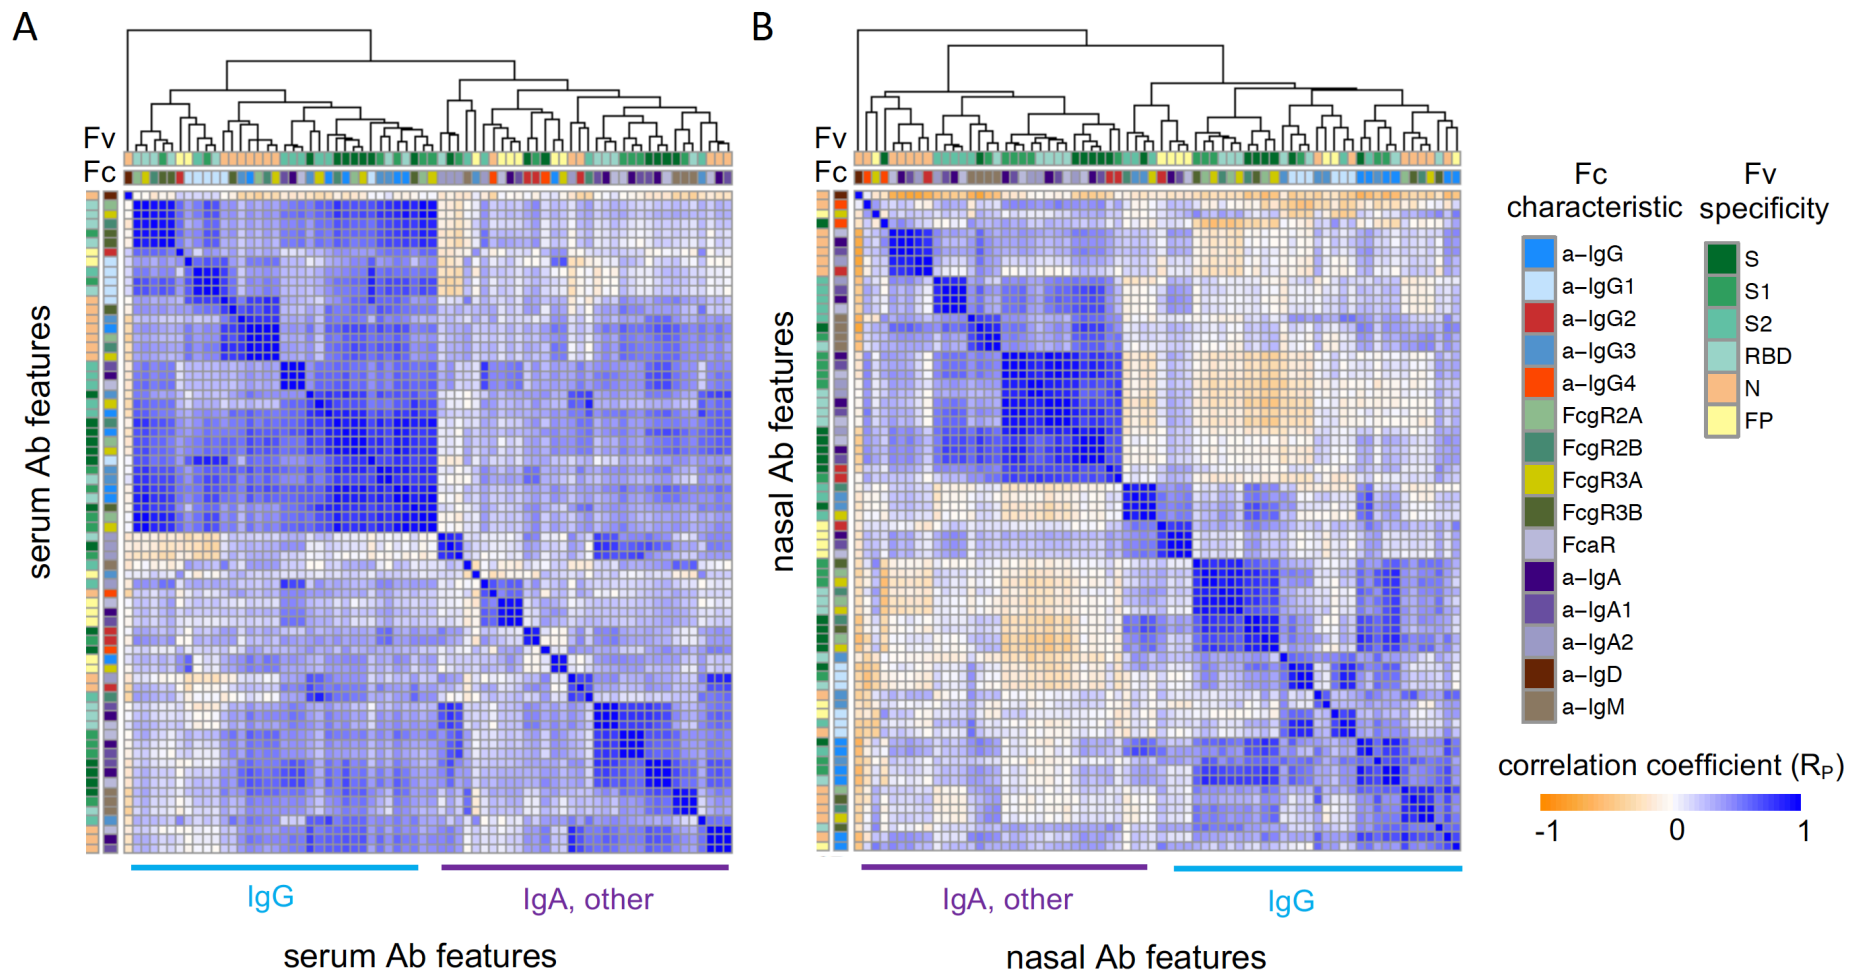

**Supplementary Figure 9. Correlations between Ab features within serum and nasal wash samples. A-B.** Correlation matrices of relationships between Ab response features measured in serum (**A**) and nasal wash (**B**) samples from convalescent donors. Antigen specificity (Fv) and Fc characteristics (Fc) are indicated in color bars. Filtered CoV-2-specific Ab features are hierarchically clustered. Pearson correlation coefficients ( $R_p$ ) are shown. Dominant isotype(s) of main branches of dendrograms are indicated.

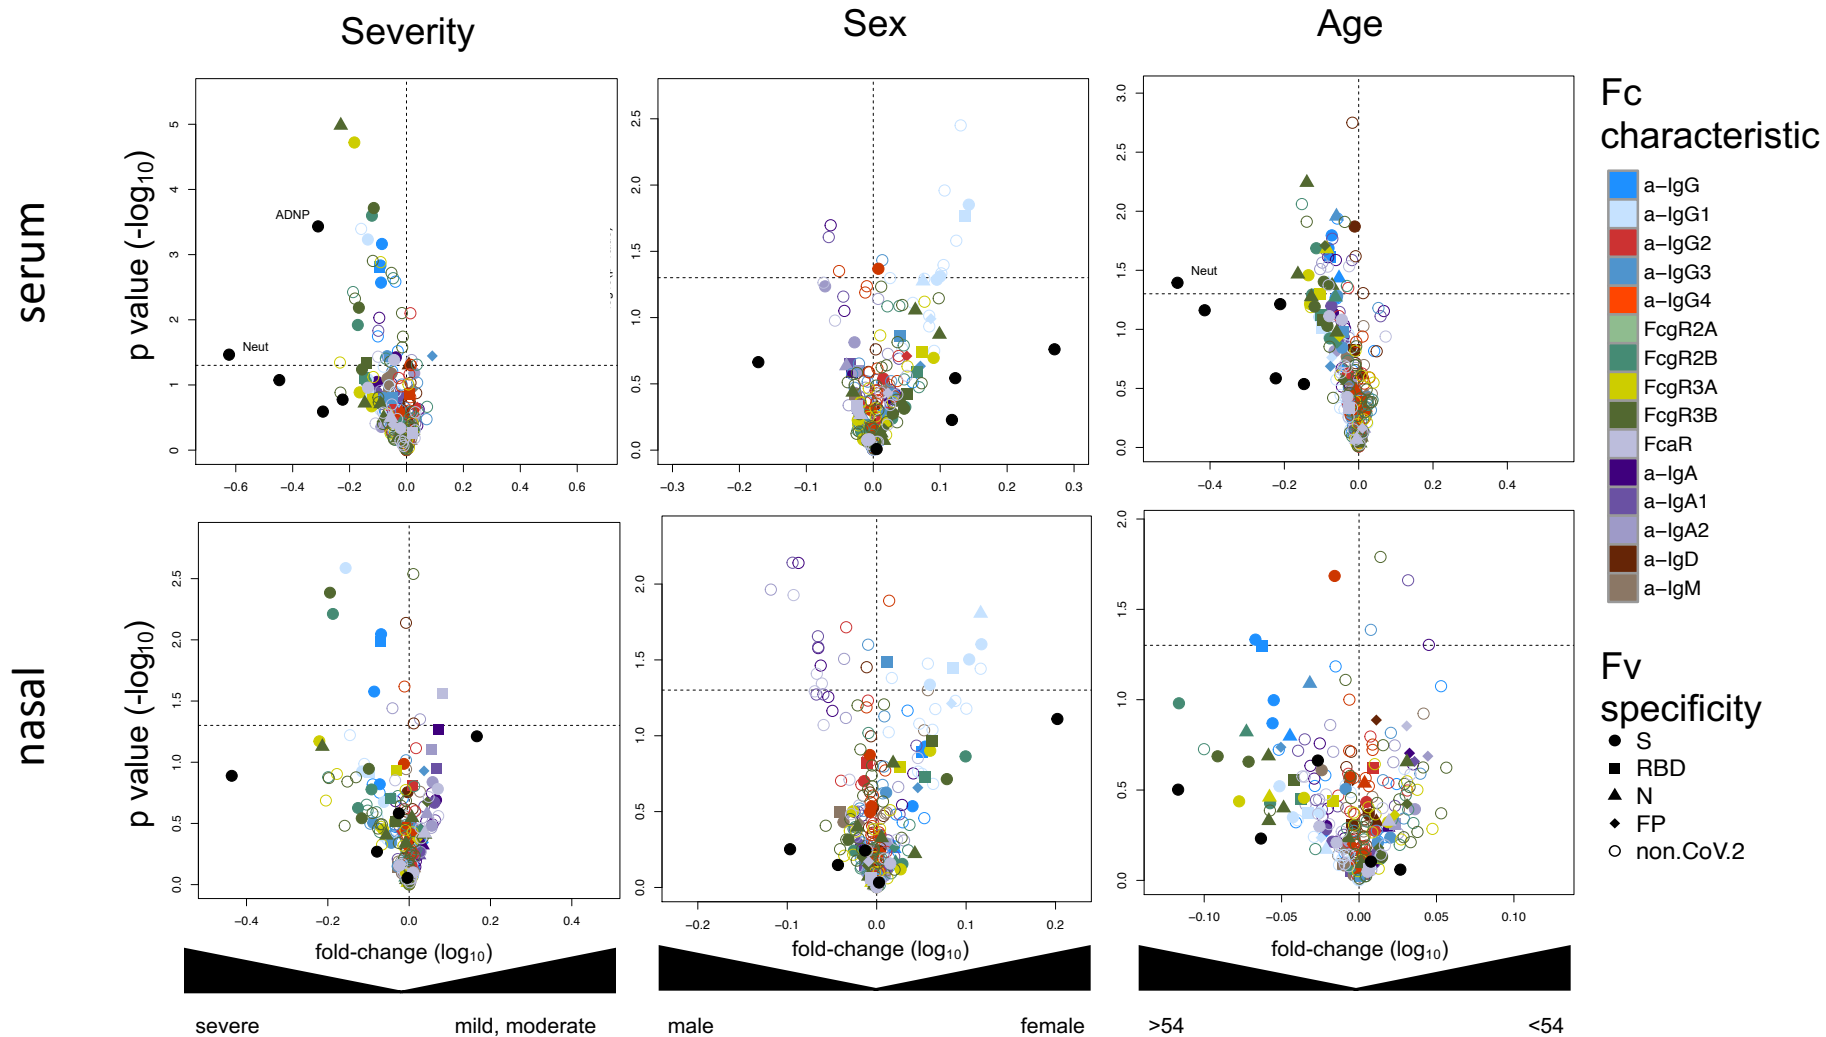

**Supplementary Figure 10. Differences in Ab responses among convalescent donors by subject characteristics.** Volcano plots depicting fold-change and unadjusted statistical significance (unpaired two-tailed t test with Welch's correction) of biophysical and functional response features in serum (top) and nasal wash (bottom) samples by disease severity (left), sex (center), and age (right). Functional assay data is labeled by a black circle with the assay name added if  $p < 0.05$ , and Fc array data is depicted with antigen specificity indicated by shape and Fc characteristic indicated by color. Dotted horizontal line indicates  $p = 0.05$ .

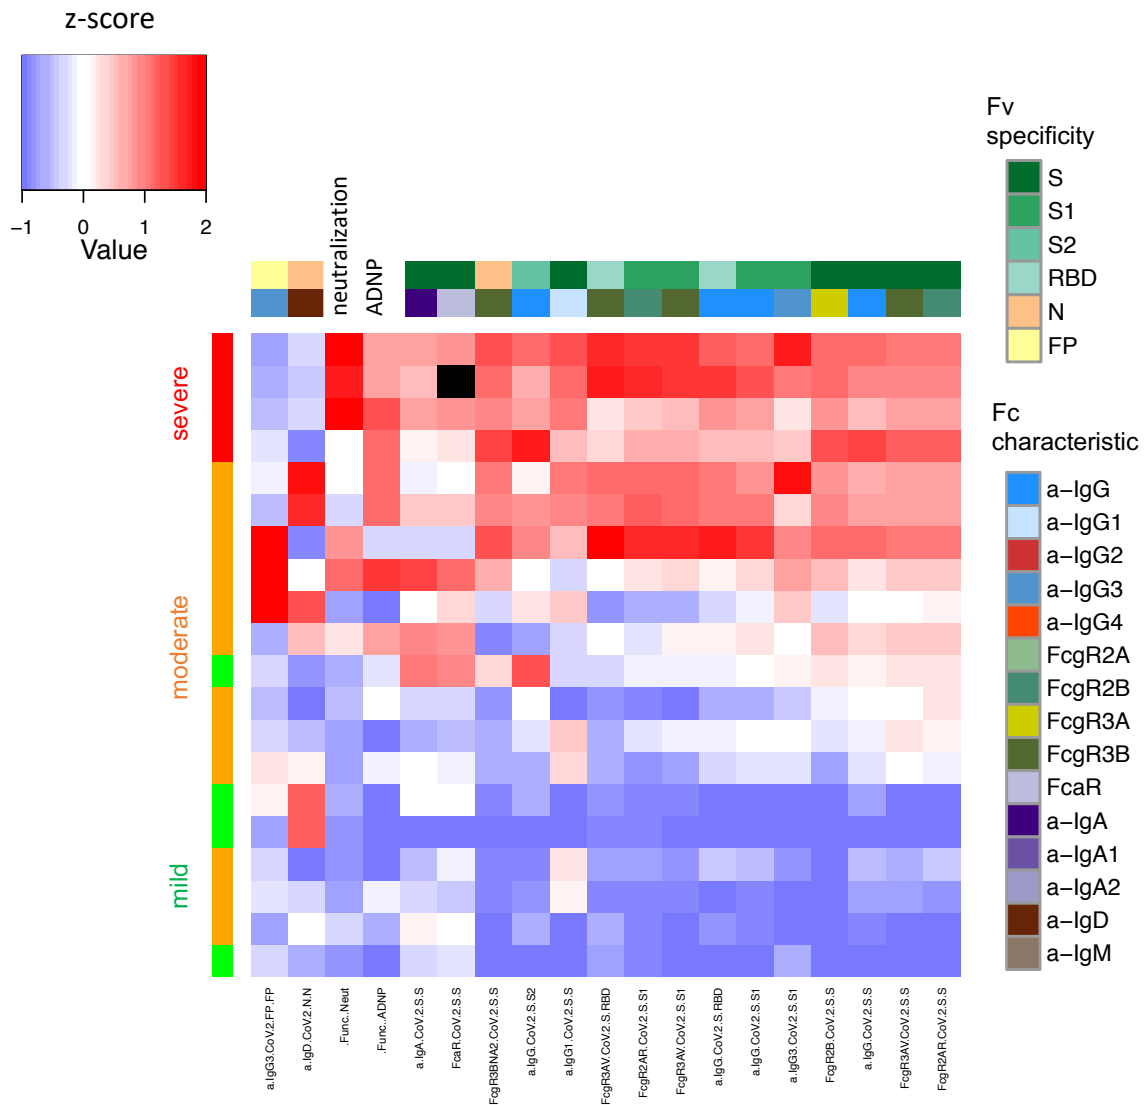

**Supplementary Figure 11. Heatmap of serum Ab features that differ between donors who experienced severe versus non-severe disease.** Features and subjects are hierarchically-clustered with Fv specificity (viral antigen) and Fc characteristic (detection) indicated in x-axis color bar. Subjects are stratified by infection or disease severity status. Responses are centered and scaled per feature and the scale range truncated at +2/-1 SD. Black cell indicates missing data.

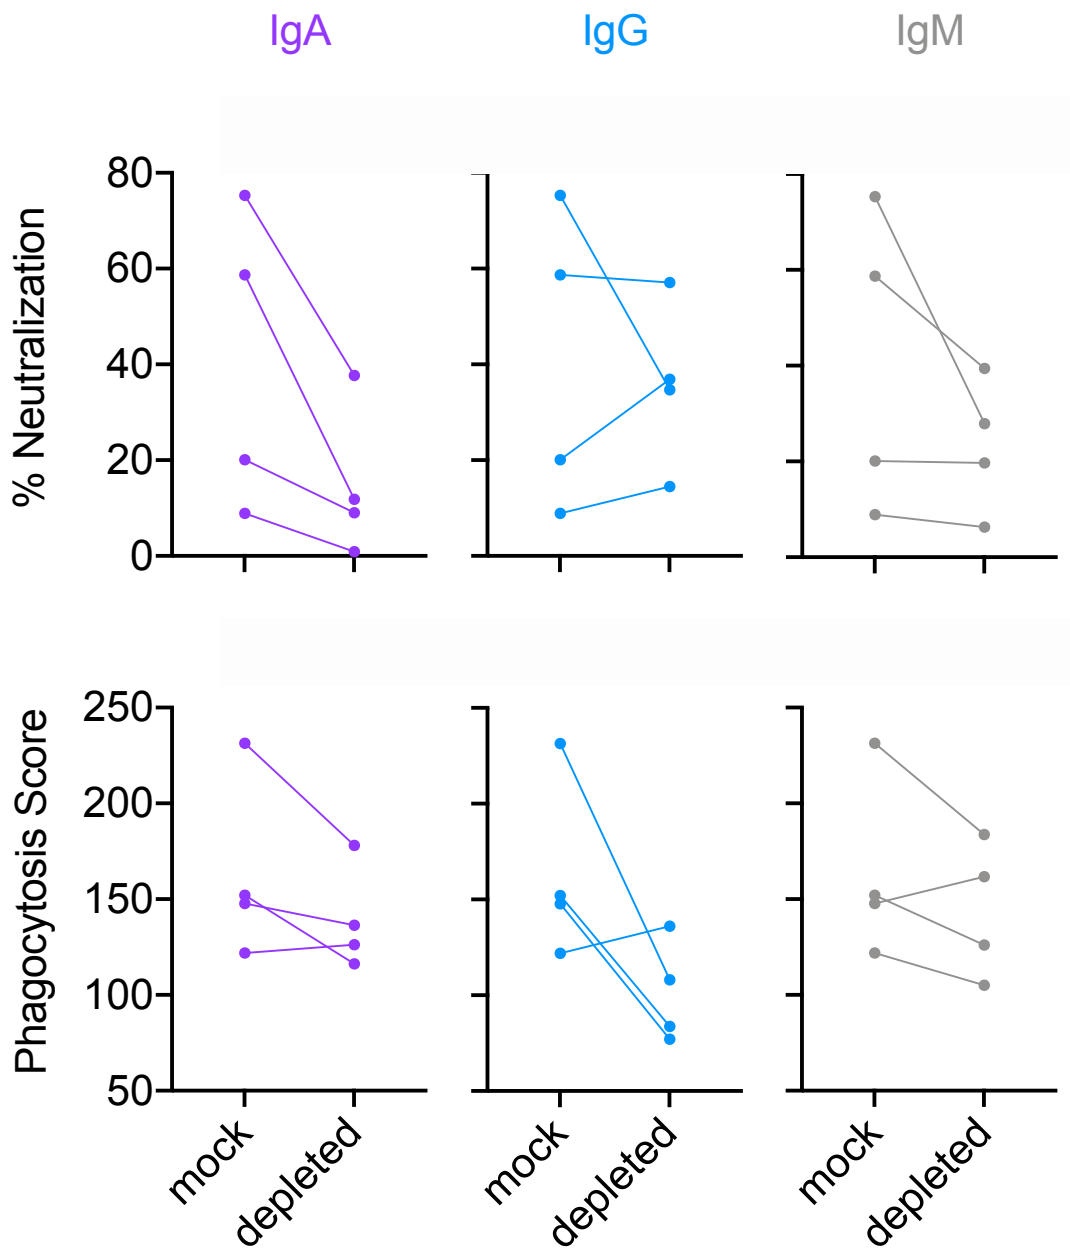

**Supplementary Figure 12. Impact of isotype depletion on nasal wash neutralization and phagocytosis.** Neutralization (top) and phagocytosis (bottom) activity observed in select nasal wash samples with (depleted) or without (mock) IgA (left), IgG (center), or IgM (right) depletion.

**Supplementary Table 1.** Demographic data for convalescent and naïve donors

| <b>Characteristic</b>                 | <b>Convalescent</b>  |                         |                    | <b>Naïve</b><br>n=15 |
|---------------------------------------|----------------------|-------------------------|--------------------|----------------------|
|                                       | <b>Severe</b><br>n=4 | <b>Moderate</b><br>n=12 | <b>Mild</b><br>n=4 |                      |
| Median age (IQR), years               | 66.5 (49-77)         | 54 (18-74)              | 26 (26-59)         | 34 (28-52)           |
| Sex                                   |                      |                         |                    |                      |
| Female                                | 2 (50%)              | 7 (58.33%)              | 1 (25%)            | 8 (53.3%)            |
| Male                                  | 2 (50%)              | 5 (41.66%)              | 3 (75%)            | 7 (46.7%)            |
| Median days since symptom onset (IQR) | 40.5 (29-56)         | 38 (30-67)              | 31 (19-42)         | Not applicable       |

**Supplementary Table 2. Antigen and Fc Detection Reagents**

| <b>Antigen</b>                  | <b>Source</b>                      | <b>Fc Detection</b> | <b>Source</b>                       |
|---------------------------------|------------------------------------|---------------------|-------------------------------------|
| H1N1 HA1                        | Immune Technology<br>IT-003-00110p | a- IgG              | Southern Biotech<br>1030-09         |
| HSV gE                          | Immune Technology<br>IT-005-005p   | a-IgG1              | Southern Biotech<br>9054-09         |
| HCoV OC43 S                     | Sino Biological<br>40607-V08B      | a-IgG2              | Southern Biotech<br>9070-09         |
| OC43 S-2P                       | Expressed in HEK<br>293F           | a-IgG3              | Southern Biotech<br>9210-09         |
| 229E S1                         | Sino Biological<br>40605-V08H      | a-IgG4              | Southern Biotech<br>9200-09         |
| 229E S-2P                       | Expressed in Expi<br>293           | a-IgA               | Southern Biotech<br>2050-09         |
| HKU1 S1                         | Sino Biological<br>40606-V08H      | a-IgA1              | Southern Biotech<br>9130-09         |
| HKU S-2P                        | Expressed in Expi<br>293           | a-IgA2              | Southern Biotech<br>9140-09         |
| NL63 S1                         | Sino Biological<br>40604-V08H      | a-IgM               | Southern Biotech<br>9020-09         |
| MERS S1                         | Sino Biological<br>40069-V08H-50   | a-IgD               | Southern Biotech<br>9030-09         |
| MERS S-2P                       | Expressed in Expi<br>293           | Fc $\alpha$ R       | Duke Protein<br>Production Facility |
| SARS CoV-1 S1                   | Sino Biological<br>40150-V08B1     | Fc $\gamma$ R2a     | Boesch, et. al, 2014 <sup>1</sup>   |
| WIV1 S-2P                       | Expressed in Expi<br>293           | Fc $\gamma$ R2b     | Boesch, et. al, 2014 <sup>1</sup>   |
| SARS CoV-2 N                    | Immune Technology<br>IT-002-033Ep  | Fc $\gamma$ R3a     | Boesch, et. al, 2014 <sup>1</sup>   |
| SARS CoV-2 fusion<br>peptide    | New England<br>Peptide             | Fc $\gamma$ R3b     | Boesch, et. al, 2014 <sup>1</sup>   |
| SARS CoV-2 S1 (for Fc<br>Array) | ACROBiosystems<br>S1N-C52H3-100ug  |                     |                                     |
| SARS CoV-2 S1 (for<br>ADCD)     | Sino Biological<br>40150-V08B1-20  |                     |                                     |
| SARS CoV-2 RBD                  | BEI Resources<br>NR-52366          |                     |                                     |
| SARS CoV-2 S2                   | Immune Technology<br>IT-002-034p   |                     |                                     |
| SARS CoV-2 S-2P                 | Expressed in Expi<br>293           |                     |                                     |

<sup>1</sup>Boesch AW, Brown EP, Cheng HD, Ofori MO, Normandin E, Nigrovic PA, et al. Highly parallel characterization of IgG Fc binding interactions. MAb. 2014;6(4):915-27.



**Supplementary Table 3. CoV Antigen Sequences**

| Antigen           | Sequence (5' → 3')                                                                                                                                                                                                                                                                                                                                                                                                                                                                                                                                                                                                                                                                                                                                                                                                                                                                                                                                                                                                                                                                                                                                                                                                                                                                                                                                                                                                                                                                                                                                                                                                                                                                                                                                                                                                                                                                                                                                                                                                                                                                                                                                                                                                                                                                                                                                                                                                                                                                                                                                                                                                                                                                                                                                                                                                                                                                                                                                                                                                                                                                                                               |
|-------------------|----------------------------------------------------------------------------------------------------------------------------------------------------------------------------------------------------------------------------------------------------------------------------------------------------------------------------------------------------------------------------------------------------------------------------------------------------------------------------------------------------------------------------------------------------------------------------------------------------------------------------------------------------------------------------------------------------------------------------------------------------------------------------------------------------------------------------------------------------------------------------------------------------------------------------------------------------------------------------------------------------------------------------------------------------------------------------------------------------------------------------------------------------------------------------------------------------------------------------------------------------------------------------------------------------------------------------------------------------------------------------------------------------------------------------------------------------------------------------------------------------------------------------------------------------------------------------------------------------------------------------------------------------------------------------------------------------------------------------------------------------------------------------------------------------------------------------------------------------------------------------------------------------------------------------------------------------------------------------------------------------------------------------------------------------------------------------------------------------------------------------------------------------------------------------------------------------------------------------------------------------------------------------------------------------------------------------------------------------------------------------------------------------------------------------------------------------------------------------------------------------------------------------------------------------------------------------------------------------------------------------------------------------------------------------------------------------------------------------------------------------------------------------------------------------------------------------------------------------------------------------------------------------------------------------------------------------------------------------------------------------------------------------------------------------------------------------------------------------------------------------------|
| SARS-CoV-2 (S-2P) | ATGTTTCGTGTTCCCTGGTGCTCCTGCCTCTGGTGAGCAGCCAGTGCGTGAACCTG<br>ACCACCCGAACCCAGCTCCCACCAGCCTACACCAACAGCTTTACACGGGGCGTG<br>TACTACCCTGACAAGGTGTTTCCAGATCTAGCGTCTGCACAGCACTCAGGACCTCT<br>TCCTGCCGTTCTTCAGCAACGTGACATGGTTCCACGCCATCCACGTGAGCGGCA<br>CAAACGGAACCAAGCGGTTTGATAACCCCGTCCTGCCATTCAATGATGGAGTTTA<br>CTTCCGCCAGTACCGAGAAGAGTAACATCATCCGGGGCTGGATCTTCGGCACCAC<br>CCTGGATAGCAAAACACAGAGCCTCCTGATCGTGAACAATGCCACGAACGTCGT<br>GATCAAGGTGTGCGAGTTCCAGTTTTGCAATGATCCTTTCTGGGTGTGACTAC<br>CACAAGAACAACAAGAGCTGGATGGAAAGCGAGTTCAGAGTCTACAGCAGCGCC<br>AACAACTGCACATTCGAGTACGTCTCTCAGCCTTTTCTGATGGACCTTGAGGGGA<br>AACAAAGGCAACTTCAAGAACCTGAGAGAATTCGTGTTCAAGAACATCGACGGTA<br>CTTCAAATCTACTCCAAGCACACCCCATCAACCTGGTCCGGGACCTCCCTCAG<br>GGCTTCAGCGCCCTGGAACCCCTGGTCGACCTGCCCATAGGCATCAACATAACG<br>CGTTTCAAACCCCTGCTGGCCCTGCATAGATCCTACCTGACTCCTGGCGACAGC<br>AGCAGCGGATGGACCGCCGGAGCTGCAGCCTACTATGTGGGCTACCTGCAACC<br>TAGAACCTTCCTGCTGAAGTACAACGAGAACGGCACAATCACAGACGCCGTCGA<br>CTGCGCCCTGGACCCTCTCTCTGAGACAAAGTGCACCCTGAAGTCCTTCACCGT<br>GAAAAGGGCATCTACCAGACCAGCAACTTCCGGGTGCAGCCTACAGAGAGCAT<br>CGTGCGATTTCAAACATTACCAACCTCTGCCCTTCGGCGAGGTGTTTAAACGCC<br>ACAAGATTTGCCTCCGTTTACGCCTGGAATAGAAAGAGAATCAGCAATTGTGTGG<br>CCGACTACTCCGTGCTGTATAACAGCGCCTCTTTCAGCACCTTCAAGTGCTACGG<br>CGTTTCCCAACAAAGCTGAATGACCTGTGCTTACCAACGTGTACGCCGACTCC<br>TTCGTAATTAGAGGCGATGAGGTGCGGCAGATCGCACCAGGCCAGACCGGTAA<br>GATCGCTGACTACAACATAAGCTGCCTGATGATTTTACAGGCTGCGTGATCGCC<br>TGGAACTCTAACAACTGGATAGCAAGGTGGGCGGCAACTACAACCTACCTGTAC<br>CGGCTGTTTCGCAAGTCTAACCTGAAACCTTTCGAGAGAGACATCTCCACAGAGA<br>TCTACCAGGCCGTTCTACACCTTGTAAACGGGTGGAAGGCTTCAACTGTTACTT<br>CCCTCTGCAAAGCTACGGCTTCCAGCCTACCAATGGAGTCGGTACCAGCCATA<br>CCGGGTGGTTCGTGCTGCTTTCGAGTTACTCCACGCCCCCGCCACCGTCTGCG<br>GTCCTAAGAAGTCCACCAATCTGGTTAAGAACAATGCGTGAACCTTCAACTTCAA<br>CGGCCTGACCGGGACCGCGTGCTGACCGAAAGCAACAAAAGTTCCCTCCCTT<br>CCAGCAGTTCGGCCGTGATATCGCTGACACCACAGATGCCGTCAGAGATCCACA<br>GACCCTGGAAATCCTGGATATTACACCCTGCTCCTTCGGAGGAGTTTCTGTGATC<br>ACCCCCGGGACCAATACCAGCAACCAGGTGGCTGTGCTGTACCAAGATGTTAAC<br>TGCACCGAGGTTCTGTGGCCATCCACGCCGATCAGCTGACACCTACTTGGAGA<br>GTGTACTCCACTGGCTCCAATGTGTTCCAGACCAGGGCCGGATGTCTGATCGGC<br>GCCGAGCACGTGAATAACAGTTACGAGTGCACATCCCTATCGGCGCCGGCAGC<br>TGTGCCAGCTACCAGACCCAGACAAACAGCCCTGGGTCTGCTTCTCTGTAGCT<br>AGCCAGAGCATCATCGCCTACCCATGAGCCTGGGCGCAGAGAACAGCGTGGC<br>CTATTCCAACAACTCTATCGCCATTCCCACCAACTTTACAATTAGCGTCACAACAG<br>AGATCCTGCCCGTGAGCATGACCAAGACCAGCGTGGACTGTACAATGTACATCT<br>GTGGCGACAGCACTGAATGCAGCAACCTGCTGCTGCAATACGGCTCCTTTTGCA<br>CCAAAGTGAACCGGGCGCTGACCGGAATCGCCGTGGAACAGGACAAAATACC<br>CAGGAGGTGTTCCGCCAAGTGAAGCAGATCTACAAGACCCACCTATCAAGGAC<br>TTCGGCGGCTTTAACTTTAGCCAGATTCTCCCTGATCCTTCTAAGCCTAGCAAGC<br>GGAGCTTTATCGAGGATCTGCTGTTCAACAAGGTCACCCTGGCCGATGCCGGCT<br>TTATCAAACAGTATGGCGATTGCCTGGGCGACATAGCCGCCAGAGATCTGATCT<br>GCGCCCAGAAATCAACGGCCTGACAGTTCTCCACCTCTGCTGACCGACGAGA<br>TGATCGCTCAGTACACCTCTGCCCTGCTGGCTGGCACCATCACATCTGGGTGGA<br>CATTTGGCGCCGGCGCCGCCCTGCAGATCCCCTTTGCCATGCAGATGGCCTATA<br>GATTC AACGGAATCGGCGTGACCCAGAACGTGCTGTATGAAAACAGAAAGCTGA<br>TCGCTAACAGTTCAATTCTGCCATCGGCAAGATCCAGGACTCCCTCTCTCTAC |

|                              |                                                                                                                                                                                                                                                                                                                                                                                                                                                                                                                                                                                                                                                                                                                                                                                                                                                                                                                                                                                                                                                                                                                                                                                                                                                                                                                                                                                                                                                                                                                                                                                                                                                                                                                                                                                                                                                               |
|------------------------------|---------------------------------------------------------------------------------------------------------------------------------------------------------------------------------------------------------------------------------------------------------------------------------------------------------------------------------------------------------------------------------------------------------------------------------------------------------------------------------------------------------------------------------------------------------------------------------------------------------------------------------------------------------------------------------------------------------------------------------------------------------------------------------------------------------------------------------------------------------------------------------------------------------------------------------------------------------------------------------------------------------------------------------------------------------------------------------------------------------------------------------------------------------------------------------------------------------------------------------------------------------------------------------------------------------------------------------------------------------------------------------------------------------------------------------------------------------------------------------------------------------------------------------------------------------------------------------------------------------------------------------------------------------------------------------------------------------------------------------------------------------------------------------------------------------------------------------------------------------------|
|                              | <p>CGCCAGCGCCCTGGGCAAACCTGCAGGACGTGGTGAATCAGAACGCCCAAGCCC<br/> TGAACACCCTGGTGAAGCAGCTCAGCAGCAATTTTGGCGCCATCAGCTCTGTGC<br/> TGAACGATATCCTGTCTAGACTGGACCCTCCAGAAGCCGAAGTCCAGATCGATA<br/> GACTGATCACAGGCAGACTGCAGTCCCTGCAAACCTACGTGACCCAACAGCTGA<br/> TCAGGGCCGCTGAAATAAGAGCCAGCGCCAATCTCGCCGCTACCAAGATGTCCG<br/> AGTGTGTGCTGGGACAGTCTAAACGCGTTGACTTCTGCGGCAAAGGCTATCACC<br/> TGATGAGCTTCCCCAGAGCGCGCCGCACGGCGTGGTGTTCCTGCATGTGACAT<br/> ACGTGCCTGCCAAGAGAAGAATTTACAACCGCCCCTGCCATCTGCCACGACG<br/> GCAAGGCCCACTTCCCAAGAGAGGGCGTTTTTCGTTTCCAATGGCACACACTGGT<br/> TCGTGACACAAAGAACTTCTACGAACCCAGATTATCACCACCGACAACACCTT<br/> CGTGAGTGGCAATTGTGACGTGGTCATCGGAATCGTGAACAACACAGTGTACGA<br/> CCCTCTGCAACCTGAGCTGGACTCTTTAAGGAAGAGCTGGACAAGTACTTTAAA<br/> AACCACACCAGCCCCGATGTGGACCTGGGCGACATCAGTGGCATTACGCCAGC<br/> GTGGTGAACATCCAAAAGGAAATCGACAGACTGAACGAGGTGGCCAAGAACCTG<br/> AACGAGTCCCTGATCGACCTGCAGGAGCTCGGCAAATACGAGCAGGGATCCGG<br/> ATACATCCCCGAGGCCCCAGAGATGGCCAGGCCTACGTGCGGAAGGACGGCG<br/> AGTGGTACTGCTGAGCACATTCTGGGCAGATCCCTGGAGGTGCTGTTCCGAGG<br/> GCCAGGCCATCACCACCATCACCACCATCATAGCGCCTGGTCCCACCCCCAGT<br/> TCGAGAAGGGCGGCGGTAGTGGAGGGGGCGGATCTGGCGGCTCAGCTTGAG<br/> CCACCCCCAGTTCGAAAAGTGA</p>                                                                                                                                                                                                                                                                                                                                                                                                                                                                                                                                                                                                                                                         |
| <p>SARS-CoV-2<br/>RBD-Fc</p> | <p>ATGCGGCCTACTTGGGCCTGGTGGCTGTTTCTGGTGCTGCTGCTAGCTCTGTGG<br/> GCACCCGCTAGAGGGCGGGTGCAGCCTACAGAGAGCATCGTGCGATTTCCAAA<br/> CATTACCAACCTCTGCCCTTCGGCGAGGTGTTTAAACGCCACAAGATTTGCCTCC<br/> GTTTACGCCTGGAATAGAAAGAGAATCAGCAATTGTGTGGCCGACTACTCCGTG<br/> CTGTATAACAGCGCCTCTTTCAGCACCTTCAAGTGCTACGGCGTTTTCCCAACAA<br/> AGCTGAATGACCTGTGCTTACCAACGTGTACGCCGACTCCTTCGTAATTAGAGG<br/> CGATGAGGTGCGGCAGATCGCACCAGGCCAGACCGGTAAGATCGCTGACTACA<br/> ACTATAAGCTGCCTGATGATTTTACAGGCTGCGTGATCGCCTGGAACCTAACA<br/> CCTGGATAGCAAGGTGGGCGGCAACTACAACCTACCTGTACCGGCTGTTTCGCAA<br/> GTCTAACCTGAAACCTTTCGAGAGAGACATCTCCACAGAGATCTACCAGGCCGG<br/> TTCTACACCTTGTAAACGGGGTGAAGGCTTCAACTGTTACTTCCCTCTGCAAAGC<br/> TACGGCTTCCAGCCTACCAATGGAGTCGGCTACCAGCCATAACGGGTGGTCTGTG<br/> CTGTCTTCGAGTTACTCCACGCCCCCGCCACCGTCTGCGGTCTAAGAAGTCC<br/> ACCAATCTGGTTAAGAACAATGCGTGAACCTTCAACTTCAACGGCCTGACCGGGA<br/> CCGGCGTGCTGACCGAAAGCAACAAAAGTTTCTCCCTTCCAGCAGTTCCGGCC<br/> GTGATATCGCTGACACCACAGATGCCGTGAGAGATCCACAGACCCTGGAAATCC<br/> TGGATATTACACCCTGCTCCGGATCCCTGGAGGTGCTGTTCCAGGGCCCAACTC<br/> ACACATCCCCACCGAGCCAGCACCTGAACTCCTGGGGGGACCGTCAGTCTTCC<br/> TCTTCCCCCAAACCCAAGGACACCCTCATGATCTCCCGGACCCCTGAGGTCA<br/> CATGCGTGGTGGTGGACGTGAGCCACGAAGACCCTGAGGTCAAGTTCAACTGGT<br/> ACGTGGACGGCGTGGAGGTGCATAATGCCAAGACAAAGCCCGCGGGAGGAGCAG<br/> TACAACAGCACGTACCGTGTGGTCAGCGTCTCACCGTCTGCACCAGGACTGG<br/> CTGAATGGCAAGGAGTACAAGTGAAGGTCTCCAACAAAGCCCTCCAGCCCCC<br/> ATCGAGAAAACCATCTCAAAGCCAAAGGGCAGCCCCGAGAACCACAGGTGTAC<br/> ACCAAACCCCATCCCGGGATGAGCTGACCAAGAACCAGGTGAGCCTGTCTCTGC<br/> CTGGTCAAAGGCTTCTATCCAGCGACATCGCCGTGGAGTGGGAGAGCAATGG<br/> GCAGCCGGAGAACAACCTACAAGACCACGGTCCCCGTGCTGGACTCCGACGGCT<br/> CCTTCAGGCTCGCCAGCTATCTCACCGTGGACAAGAGCAGGTGGCAGCAGGGG<br/> AACGTCTTCTCATGCTCCGTGATGCATGAGGCTCTGCACAACCACTACACGCAGA<br/> AGAGCCTCTCCCTGTCTCCGGGTAACATCACCATCATCACCACCATCACTAG</p> |
| <p>SARS-CoV<br/>(S-2P)</p>   | <p>ATGTTTATCTTCTGCTGTTTCTGACCCTGACCAGCGGCAGCGACCTGGACCGG<br/> TGCACCACCTTCGACGACGTGCAGGCCCCCAACTACACCAGCACACCAGCAGC<br/> ATGCGGGGCGTGTACTACCCCGACGAGATCTTCCGGAGCGACACCCTGTACCTG<br/> ACCCAGGACCTGTTCTGCCCCTTCTACAGCAACGTGACCGGCTTCCACACCATC<br/> AACCACACCTTCGGCAACCCCGTATCCCTTCAAGGACGGCATCTACTTCGCC<br/> GCCACCGAGAAGAGCAACGTGGTGCGGGGCTGGGTGTTCCGGCAGCACCATGAA</p>                                                                                                                                                                                                                                                                                                                                                                                                                                                                                                                                                                                                                                                                                                                                                                                                                                                                                                                                                                                                                                                                                                                                                                                                                                                                                                                                                                                                                                                                                         |

CAACAAGAGCCAGAGCGTGATCATCATCAACAACAGCACCAACGTGGTGATCCG  
GGCCTGCAACTTCGAGCTGTGCGACAACCCCTTCTTCGCCGTGAGCAAGCCCAT  
GGGCACCCAGACCCACACCATGATCTTCGACAACGCCTTCAACTGCACCTTCGA  
GTACATCAGCGACGCCTTCAGCCTGGACGTGAGCGAGAAGAGCGGCAACTTCAA  
GCACCTGCGGGAGTTTCGTGTTCAAGAACAAGGACGGCTTCTGTACGTGTACAA  
GGGCTACCAGCCCATCGACGTGGTGCGGGACCTGCCAGCGGCTTCAACACCC  
TGAAGCCCATCTTCAAGCTGCCCTGGGCATCAACATCACCAACTTCCGGGCCA  
TCTGACCGCCTTCAGCCCCGCCAGGACATCTGGGGCACCAGCGCCGCCGCC  
TACTTCGTGGGCTACCTGAAGCCCACCACCTTCATGCTGAAGTACGACGAGAAC  
GGCACCATCACCGACGCCGTGGACTGCAGCCAGAACCCCTGGCCGAGCTGAA  
GTGCAGTGTGAAGAGCTTCGAGATCGACAAGGGCATCTACCAGACCAGCAACTT  
CCGGGTGGTGCCAGCGGCGACGTGGTGCGGTTCCCAACATCACCAACTGT  
GCCCTTCGGCGAGGTGTTCAACGCCACCAAGTTCCCAAGCGTGTACGCCTGG  
GAGCGGAAGAAGATCAGCAACTGCGTGGCCGACTACAGCGTGTGTACAACAG  
CACCTTCTTCAGCACCTTCAAGTGCTACGGCGTGAGCGCCACCAAGCTGAACGA  
CCTGTGCTTCAGCAACGTGTACGCCGACAGCTTCTGTGGTGAAGGGCGACGACGT  
CGGCGAGATCGCCCCCGGCCAGACCGCGGTGATCGCCGACTACAACAGC  
TGCCCGACGACTTCATGGGCTGCGTGCTGGCCTGGAACACCCGGAACATCGAC  
GCCACCAGCACCGGCAACTACAACATAAGTACCGGTACCTGCGGCACGGCAA  
GCTGCGGCCCTTCGAGCGGGACATCAGCAACGTGCCCTTCAGCCCCGACGGCA  
AGCCCTGCACCCCCCGCCCTGAAGTACTGGCCCTGAACGACTACGGCT  
TCTACACCACTACCGGCATCGGCTACCAGCCCTACCGGGTGGTGGTGTGAGCT  
TCGAGCTGCTGAACGCCCGCCACCGTGTGCGGCCCAAGCTGAGCACCGAC  
CTGATCAAGAACCAGTGCCTGAACCTCAACTTCAACGGCCTGACCGGCACCGGC  
GTGCTGACCCCCAGCAGCAAGCGGTTCCAGCCCTTCAGCAGTTCGGCCGGGA  
CGTGAGCGACTTCACCGACAGCGTGCGGGACCCCAAGACCAGCGAGATCCTGG  
ACATCAGCCCCTGCGCCTTCGGCGGCGTGAGCGTGATCACCCCCGGTACCAAC  
GCCAGCAGCGAGGTGGCCGTGCTGTACCAGGACGTGAAGTGCACCGACGTGAG  
CACCGCCATCCACGCCGACCAGCTGACCCCCGCCTGGCGGATCTACAGCACCG  
GCAACAACGTGTTCCAGACCCAGGCCGGCTGCCTGATCGGCGCCGAGCACGTG  
GACACCAGCTACGAGTGCAGATCCCCATCGGCGCCGGCATCTGCGCCAGCTA  
CCACACCGTGAGCCTGCTGCGGAGCACCAGCCAGAAGAGCATCGTGGCCTACA  
CCATGAGCCTGGGCGCCGACAGCAGCATCGCCTACAGCAACAACACCATCGCC  
ATCCCCACCAACTTCAGCATCAGCATCACACCGAGGTGATGCCCGTGAGCATG  
GCCAAGACCAGCGTGGACTGCAACATGTACATCTGCGGCGACAGCACCGAGTG  
CGCCAACCTGCTGCTGCAGTACGGCAGCTTCTGCACCCAGCTGAACCGGGCCC  
TGAGCGGCATCGCCGCCGAGCAGGACCGGAACACCCGGGAGGTGTTCCGCCA  
GGTGAAGCAGATGTACAAGACCCCCACCCTGAAGTACTTCGGCGGCTTCAACTT  
CAGCCAGATCCTGCCCGACCCCTGAAGCCACCAAGCGGAGCTTCATCGAGG  
ACCTGCTGTTCAACAAGGTGACCTGGCCGACGCCGCTTTCATGAAGCAGTACG  
CGAGTGCTGGGCGACATCAACGCCCGGACCTGATCTGCGCCAGAAGTTC  
AACGGCCTGACCGTGCTGCCCCCCCTGCTGACCGACGACATGATGCCCGCCTA  
CACCGCCGCCCTGGTGAGCGGCACCGCCACCGCCGGCTGGACCTTCGGCGCC  
GGCGCCGCCCTGCAGATCCCCTTCGCCATGCAGATGGCCTACCGGTTCAACGG  
CATCGGCGTGACCCAGAACGTGCTGTACGAGAACCAGAAGCAGATCGCCAACCA  
GTTCAACAAGGCCATCAGCCAGATCCAGGAGAGCCTGACCACCACCAGCACCGC  
CCTGGGCAAGCTGCAGGACGTGGTGAACCAGAACGCCAGGCCCTGAACACCC  
TGGTGAAGCAGCTGAGCTCCAACTTCGGCGCCATCAGCAGCGTGTGAACGACA  
TCCTGAGCCGGCTGGACCCCCCGAGGCCGAGGTGCAGATCGACCGGCTGATC  
ACCGGCCGGCTGCAGAGCCTGCAGACCTACGTGACCCAGCAGCTGATCCGGGC  
CGCCGAGATCCGGGCCAGCGCAACCTGGCCGCCACCAAGATGAGCGAGTGCG  
TGCTGGGCCAGAGCAAGCGGGTGGACTTCTGCGGCAAGGGCTACCACCTGATG  
AGTTCCCCCAGGCCGCCCCCCACGGCGTGGTGTTCCTGCACGTGACCTACGT  
GCCAGCCAGGAGCGGAACCTTACCACCGCCCCCGCCATCTGCCACGAGGGCA  
AGGCCTACTTCCCCGGGAGGGCGTTCGTGTTCAACGGCACCAGCTGGTTCA  
TCACCCAGCGGAACCTTCTCAGCCCCAGATCATCACACCGACAACACCTTCGT

|             |                                                                                                                                                                                                                                                                                                                                                                                                                                                                                                                                                                                                                                                                                                                                                                                                                                                                                                                                                                                                                                                                                                                                                                                                                                                                                                                                                                                                                                                                                                                                                                                                                                                                                                                                                                                                                                                                                                                                                                                                                                                                                                                                                                                                                                                                                                                                                                                                                                                                                                                                                                                                                                                                                                                                                                                                                         |
|-------------|-------------------------------------------------------------------------------------------------------------------------------------------------------------------------------------------------------------------------------------------------------------------------------------------------------------------------------------------------------------------------------------------------------------------------------------------------------------------------------------------------------------------------------------------------------------------------------------------------------------------------------------------------------------------------------------------------------------------------------------------------------------------------------------------------------------------------------------------------------------------------------------------------------------------------------------------------------------------------------------------------------------------------------------------------------------------------------------------------------------------------------------------------------------------------------------------------------------------------------------------------------------------------------------------------------------------------------------------------------------------------------------------------------------------------------------------------------------------------------------------------------------------------------------------------------------------------------------------------------------------------------------------------------------------------------------------------------------------------------------------------------------------------------------------------------------------------------------------------------------------------------------------------------------------------------------------------------------------------------------------------------------------------------------------------------------------------------------------------------------------------------------------------------------------------------------------------------------------------------------------------------------------------------------------------------------------------------------------------------------------------------------------------------------------------------------------------------------------------------------------------------------------------------------------------------------------------------------------------------------------------------------------------------------------------------------------------------------------------------------------------------------------------------------------------------------------------|
|             | GAGCGCAACTGCGACGTGGTGATCGGCATCATCAACAACACCGTGTACGACCC<br>CCTGCAGCCCGAGCTGGACAGCTTCAAGGAGGAGCTGGACAAGTACTTCAAGAA<br>CCACACCAGCCCCGACGTGGACCTGGGCGACATCAGCGGCATCAACGCCAGCG<br>TGGTGAACATCCAGAAGGAGATCGACCGGCTGAACGAGGTGGCCAAGAACCTG<br>AACGAGAGCCTGATCGACCTGCAGGAGCTGGGCAAGTACGAGCAGGGATCCGG<br>ATACATCCCCGAGGCCCCAGAGATGGCCAGGCCTACGTGCGGAAGGACGGCG<br>AGTGGGTACTGCTGAGCACATTCCTGGGCAGATCCCTGGAGGTGCTGTTCCAGG<br>GCCAGGCCACCACCACCACCACCATCATAGCGCCTGGTCCCACCCCCAGT<br>TCGAGAAGTGA                                                                                                                                                                                                                                                                                                                                                                                                                                                                                                                                                                                                                                                                                                                                                                                                                                                                                                                                                                                                                                                                                                                                                                                                                                                                                                                                                                                                                                                                                                                                                                                                                                                                                                                                                                                                                                                                                                                                                                                                                                                                                                                                                                                                                                                                                                                                       |
| MERS (S-2P) | ATGATTCACTCCGTGTTCTGCTGATGTTCTGCTGACTCCTACAGAGAGCTATG<br>TGGATGTGGGACCTGATTCCGTCAAGAGCGCCTGCATCGAAGTGGACATTACAGC<br>AGACCTTCTTTGATAAGACATGGCCAAGACCCATCGACGTGAGCAAAGCCGATG<br>GCATCATCTACCCTCAGGGGAGGACCTATTCCAATATCACAATTACTTACCAGGG<br>CCTGTTCCCATATCAGGGAGACCACGGCGATATGTACGTGTATTCTGCTGGCCAT<br>GCAACAGGGACCACACCTCAGAAGCTGTTTGTGGCTAACTACAGCCAGGACGTC<br>AAACAGTTCGCAAATGGATTTGTGGTCCGCATCGGCGCCGTGCAAACCTTACC<br>GGCACAGTGATCATTTCACCTAGCACTTCGCAACCATCCGAAAATCTACCCAG<br>CCTTCATGCTGGGAAGCTCCGTGGCAATTTTAGCGACGGGAAAAATGGGACGGT<br>TCTTTAACCACACCCTGGTGCTGCTGCCTGATGGATGCGGCACACTGCTGAGGG<br>CTTTCTACTGTATCCTGGAGCCACGCAGCGGAAACCACTGCCCGCAGGAAATA<br>GCTACACCTCCTTTGCCACATATCATACTCCAGCTACCGACTGTTCCGATGGCAA<br>CTACAATCGAAACGCCTCTCTGAATAGTTTCAAGGAATACTTCAACCTGCGGAAT<br>TGCACATTCATGTACACTTATAACATCACCGAGGACGAAATTCTGGAGTGGTTCG<br>GAATCACTCAGACCGCACAGGGCGTGACCTGTTTTCTAGTCGCTACGTCGACC<br>TGATGGCGGGAACATGTTCCAGTTTGCCACTCTGCCCGTGTACGATACCATCAA<br>GTAATTCATCATTCTCATTCAATCCGCAGCATTAGTCCGATCGAAAGGCTT<br>GGGCGCTTTCTACGTGTATAAACTGCAGCCACTGACCTTCTGCTGGACTTTAG<br>CGTCGATGGCTACATCCGGAGAGCCATTGACTGCGGGTTTAAATGATCTGTCCA<br>GCTGCACTGTTCTTACGAAAGTTTCGACGTGGAGTCCGGCGTGTATTCTGTCTCA<br>AGCTTTGAGGCCAAGCCCTCTGGGAGTGTGGTTCGAGCAGGCTGAAGGAGTGGA<br>GTGCGATTTCAGTCTCTGCTGTCAGGGACCCCCCTCAGGTGTACAACCTCAA<br>GCGGCTGGTCTTTACTAACTGTAACATAAATCTGACCAAGCTGCTGTCACTGTT<br>AGCGTGAATGACTTTACATGCTCCAGATCAGCCCCGACGCCATTGCTAGTAACT<br>GTTACTCTCTGATCCTGGACTACTTCTCATATCCACTGAGTATGAAGAGCGA<br>CCTGAGCGTGAGTTCAGCCGGCCCCATCAGCCAGTTCAACTATAAACAGAGCTT<br>CAGCAATCCTACATGCCTGATTCTGGCTACTGTGCCACATAATCTGACTACCATC<br>ACTAAGCCCCTGAAATACTCCTATATTAACAAGTGCAGCCGGTTCCTGTCCGACG<br>ATAGAACCGAAGTGCCACAGCTGGTCAACGCCAATCAGTACTCTCCCTGTGTGA<br>GTATCGTCCCTTCAACCGTGTGGGAAGACGGGGATTACTATAGAAAACAGCTGA<br>GCCCCCTGGAGGGAGGAGGATGGCTGGTGGCATCCGGATCTACAGTCGCCATG<br>ACTGAGCAGCTGCAGATGGGGTTCGGAATCACAGTGCAGTACGGCACAGACACT<br>AACTCTGTCTGTCCCAAGCTGGAATTCGCTAACGATACTAAGATCGAAGTCAGC<br>TGGGAAACTGCGTGGAGTACTCTCTGTATGGCGTGAGTGGCAGAGGGGTCTTCC<br>AGAATTGTACCGCAGTGGGCGTCCGACAGCAGCGTTTTGTGTACGACGCCTATC<br>AGAATCTGGTCCGCTACTATAGCGACGATGGGAACTACTATTGCCTGAGGGCCT<br>GTGTGAGCGTCCCTGTGTCCGTACATCTACGATAAGGAAACCAAACACACGCCA<br>CACTGTTCCGGGTCCGTGGCTTGCGAGCATATTAGCTCCACAATGTCTCAGTACAG<br>TAGATCAACTAGGTCAATGCTGAAGAGGCGCGATAGCACCTATGGACCTCTGCA<br>GACACCAGTGGGGTGTGTCTGGGACTGGTGAACCTTAGTCTGTTTGTGAGGA<br>CTGCAAGCTGCCCTGGGCCAGAGCCTGTGCGCCCTGCCCGACACCCCCAGCA<br>CCCTGACCCCCGCCAGCGTGGGCAGCGTGCCCGGCGAGATGCGGCTGGCCAG<br>CATCGCCTTCAACCACCCCATCCAGGTGGACCAGCTGAACAGCAGCTACTTCAA<br>GCTGAGCATCCCCACCAACTTCAGCTTCGGCGTGACCCAGGAGTACATCCAGAC<br>CACCATCCAGAAGGTGACCGTGGACTGCAAGCAGTACGTGTGCAACGGCTTCCA<br>GAAGTGCGAGCAGCTGCTGCGGGAGTACGGCCAGTTCTGCAGCAAGATCAACC<br>AGGCCCTGCACGGCGCCAACCTGCGGCAGGACGACAGCGTGCGGAACCTGTTT |

|             |                                                                                                                                                                                                                                                                                                                                                                                                                                                                                                                                                                                                                                                                                                                                                                                                                                                                                                                                                                                                                                                                                                                                                                                                                                                                                                                                                                                                                                                                                                                                                                                                                                                                                                                                                                                                             |
|-------------|-------------------------------------------------------------------------------------------------------------------------------------------------------------------------------------------------------------------------------------------------------------------------------------------------------------------------------------------------------------------------------------------------------------------------------------------------------------------------------------------------------------------------------------------------------------------------------------------------------------------------------------------------------------------------------------------------------------------------------------------------------------------------------------------------------------------------------------------------------------------------------------------------------------------------------------------------------------------------------------------------------------------------------------------------------------------------------------------------------------------------------------------------------------------------------------------------------------------------------------------------------------------------------------------------------------------------------------------------------------------------------------------------------------------------------------------------------------------------------------------------------------------------------------------------------------------------------------------------------------------------------------------------------------------------------------------------------------------------------------------------------------------------------------------------------------|
|             | <p>GCTAGCGTGAAGAGCAGCCAGAGCAGCCCCATCATCCCCGGCTTCGGCGGCGA<br/> CTTCAACCTGACCCTGCTGGAGCCCGTGAGCATCAGCACCGGCAGCCGGAGCG<br/> CCCGGAGCGCCATCGAGGACCTGCTGTTTCGACAAGGTGACCATCGCCGACCCC<br/> GGCTACATGCAGGGCTACGACGACTGCATGCAGCAGGGCCCCGCCAGCGCCCG<br/> GGACCTGATCTGCGCCAGTACGTGGCCGGCTACAAGGTGCTGCCCCCCTGA<br/> TGGACGTGAACATGGAGGCCGCCTACACCAGCAGCCTGCTGGGCAGCATCGCC<br/> GGCGTGGGCTGGACCGCCGGCCTGAGCAGCTTCGCCGCCATCCCCTTCGCCCA<br/> GAGCATCTTCTACCGGCTGAACGGCGTGGGCATCACCCAGCAGGTGCTGAGCG<br/> AGAACCAGAAGCTGATCGCCAACAAGTTCAACCAGGCCCTGGGCGCCATGCAGA<br/> CCGGCTTCACCACCACCAACGAGGCCTTCCACAAGGTGCAGGACGCCGTGAAC<br/> AACACGCCCCAGGCCCTGAGCAAGCTGGCCAGCGAGCTGAGCAACACCTTCGG<br/> CGCCATCAGCGCCAGCATCGGCGACATCATCCAGCGGCTGGACCCCCCGAGC<br/> AGGACGCCCAGATCGACCGGCTGATCAACGGCCGGCTGACCACCCTGAACGCC<br/> TTCGTGGCCCAGCAGCTGGTGC GGAGCGAGAGCGCCGCCCTGAGCGCCCAGCT<br/> GGCCAAGGACAAGGTGAACGAGTGC GTGAAGGCCAGAGCAAGCGGAGCGGCT<br/> TCTGCGGCCAGGGCACCCACATCGTGAGCTTCGTGGTGAACGCCCCCAACGGC<br/> CTGTACTTCATGCACGTGGGCTACTACCCAGCAACCACATCGAGGTGGTGAGC<br/> GCCTACGGCCTGTGCGACGCCCAACCCACCAACTGCATCGCCCCCGTGAA<br/> CGGCTACTTCATCAAGACCAACAACACCCGGATCGTGGACGAGTGGAGCTACAC<br/> CGGCAGCAGCTTCTACGCCCCCGAGCCCATCACCCAGCCTGAACACCAAGTACGT<br/> GGCCCCCAGGTGACCTACCAGAACATCAGCACCAACCTGCCCCCCCCTGCT<br/> GGGCAACAGCACCGGCATCGACTTCCAGGACGAGCTGGACGAGTTCTTCAAGAA<br/> CGTGAGCACCAGCATCCCCAACTTCGGCAGCCTGACCCAGATCAACACCACCCT<br/> GCTGGACCTGACCTACGAGATGCTGAGCCTGCAGCAGGTGGTGAAGGCCCTGA<br/> ACGAGAGCTACATCGACCTGAAGGAGCTGGGCAACTACACCTACGGATCCGGAT<br/> ACATCCCCGAGGCCCCAGAGATGGCCAGGCCTACGTGCGGAAGGACGGCGAG<br/> TGGGTACTGCTGAGCACATTCCTGGGCAGATCCCTGGAGGTGCTGTTCCAGGGC<br/> CCAGGCCATCACCCACATCACCCACATCATAGCGCCTGGTCCCACCCCCAGTTC<br/> GAGAAGGGCGGCGGTAGTGGAGGGGGCGGATCTGGCGGCTCAGCTTGGAGCC<br/> ACCCCCAGTTCGAAAAGTGA</p> |
| 229E (S-2P) | <p>ATGTTTGTGCTGCTGGTGGCCTATGCACTGCTGCACATCGCAGGATGCCAGACC<br/> ACAAACGGCACCAATACAAGCCACTCCGTGTGCAACGGATGCGTGGGACACAGC<br/> GAGAACGTGTTTCGAGTGGAGAGCGGAGGATACATCCCATCCAATTTTCGCCTT<br/> AACAAATTGGTTCCTGCTGACCAACACAAGCTCCGTGGTGGACGGCGTGGTGAGA<br/> TCCTTTACGCCTCTGCTGCTGAACTGCCTGTGGTCTGTGAGCGGCTCCCAGTTCA<br/> CCACAGGCTTCGTGTACTTTAATGGCACCGGCAGAGGGCGCCTGTAAGGGCTTCT<br/> ACTCTAACGCCTCTAGCGACGTGATCAGGTATAACATCAATTTTGAGGAGAACT<br/> GCGGAGAGGCACAATCCTGTTTAAGACCTCCTACGGCGCCGTGGTGTTCATTG<br/> CACAAACAATACCCTGGTGTCCGGCGATGCCACATCCCATCTGGCACCGTGTCT<br/> GGGCAACTTCTATTGTTTTGTGAACACCACAATCGGCAATGAGACCACAAGCGCC<br/> TTTGTGGCGCCCTGCCAAAGACCGTGCGCGAGTTCGTGATCAGCCGGACAGG<br/> CCAATTTACATCAATGGCTACAGGTATTTCTCCCTGGGCGACGTGGAGGCCGT<br/> GAACTTCAATGTGACCAACGCCGCCACCACAGTGTGCACAGTGGCCCTGGCCAG<br/> CTATGCCGATGTGCTGGTGAACGTGTCCAGACCGCCATCGCCAATATCATCTA<br/> CTGCAACTCCGTGATCAATCGGCTGAGATGTGACCAGCTGTCTTTCGACGTGCC<br/> TGATGGCTTTTATTCTACAAGCCCCATCCAGCCTGTGGAGCTGCCCGTGAGCATC<br/> GTGAGCCTGCCAGTGTACCACAAGCACACCTTCATCGTGCTGTATGTGAATTTTG<br/> AGCACAGGAGGGGACCTGGCAAGTGCTACAACCTGTGCGCCTGCCGTGATCAATA<br/> TCACCCTGGCCAATTCATGAGACAAAGGGCCCTCTGTGCGTGGACACAAGCC<br/> ACTTACCACACAGTTTGTGGATAACGTGAAGCTGGCCCGGTGGTCCGCCTCTA<br/> TCAACACCGGCAATTGTCCATTCTCCTTTGGCAAGGTGAACAATTTTCGTGAAGTT<br/> TGGCAGCGTGTGCTTTAGCCTGAAGGATATCCAGGCGGCTGTGCCATGCCCAT<br/> CATGGCCAACCTGGTGAATAGCAAGTCCACAATATCGGCAGCCTGTACGTGTC<br/> TTGGAGCGACGGCGATGTGATCACAGGCGTGCCTAAGCCAGTGGAGGGCGTGT<br/> CCTCTTTCATGAACGTGACACTGAATAAGTGCACCAAGTACAACATCTATGACGT<br/> GAGCGGCGTGGGCGTGTATCCGCATCTCCAACGATACCTTCTGAATGGCATCAC</p>                                                                                                                                                                                    |

|             |                                                                                                                                                                                                                                                                                                                                                                                                                                                                                                                                                                                                                                                                                                                                                                                                                                                                                                                                                                                                                                                                                                                                                                                                                                                                                                                                                                                                                                                                                                                                                                                                                                                                                                                                                                                                                                                                                                                                                                                                                                                                                                                                                                                                                                                                                                                                                                                                                                                                                         |
|-------------|-----------------------------------------------------------------------------------------------------------------------------------------------------------------------------------------------------------------------------------------------------------------------------------------------------------------------------------------------------------------------------------------------------------------------------------------------------------------------------------------------------------------------------------------------------------------------------------------------------------------------------------------------------------------------------------------------------------------------------------------------------------------------------------------------------------------------------------------------------------------------------------------------------------------------------------------------------------------------------------------------------------------------------------------------------------------------------------------------------------------------------------------------------------------------------------------------------------------------------------------------------------------------------------------------------------------------------------------------------------------------------------------------------------------------------------------------------------------------------------------------------------------------------------------------------------------------------------------------------------------------------------------------------------------------------------------------------------------------------------------------------------------------------------------------------------------------------------------------------------------------------------------------------------------------------------------------------------------------------------------------------------------------------------------------------------------------------------------------------------------------------------------------------------------------------------------------------------------------------------------------------------------------------------------------------------------------------------------------------------------------------------------------------------------------------------------------------------------------------------------|
|             | <p>CTATACATCCACCTCTGGCAATCTGCTGGGCTTCAAGGACGTGACAAACGGCAC<br/> CATCTACAGCATCACACCATGTAATCCCCCTGATCAGCTGGTGGTGTATCAGCAG<br/> GCAGTGGTGGGAGCAATGCTGTCCGAGAACTTACCTCCTACGGCTTTTCTAAT<br/> GTGGTGGAGATGCCAAGTTCTTTTACGCCTCTAACGGCACATATAATTGCACCG<br/> ACGCCGTGCTGACATATAGCAGCTTCGGCGTGTGCGCCGATGGCTCTATCATCG<br/> CCGTGCAGCCTCGGAACGTGAGCTACGACAGCGTGTCCGCCATCGTGACCGCC<br/> AACCTGTCTATCCCTTTCAATTGGACCACAAGCGTGCAGGTGGAGTACCTGCAGA<br/> TCACATCCACCCCAATCGTGGTGGACTGCTCTACCTACGTGTGCAACGGCAATG<br/> TGGCTGCGTGGAGCTGCTGAAGCAGTACACAAGCGCCTGTAAGACCATCGAG<br/> GATGCCCTGCGGAACTCCGCCATGCTGGAGAGCGCCGACGTGTCCGAGATGCT<br/> GACCTTCGATAAGAAGGCCTTTACTGGCCAACGTGTCTAGCTTTGGCGACTAT<br/> AATCTGTCTCTGTGATCCCATCTCTGCCACGGTCTGGCAGCAGAGTGGCAGGC<br/> AGGAGCGCCATCGAGGATATCCTGTTCTCTAAGCTGGTGACAAGCGGACTGGGC<br/> ACCGTGGACGCCGATTACAAGAAGTGCACCAAGGGACTGAGCATCGCAGACCTG<br/> GCATGTGCCAGTACTATAACGGAATCATGGTGTCTGCCAGGAGTGGCAGATGCA<br/> GAGCGCATGGCCATGTATACAGGCTCCCTGATCGGCCGATCGCCCTGGGAGG<br/> ACTGACCTCCGCCCATCTATCCCTTTCTCCCTGGCCATCCAGTCTCGCCTGAAT<br/> TACGTGGCCCTGCAGACCGACGTGCTGCAGGAGAACCAGAGAATCCTGGCCGC<br/> CAGCTTCAACAAGGCCATGACCAATATCGTGGACGCCTTTACAGGCGTGAATGAT<br/> GCCATCACACAGACCTCCAGGCCCTGCAGACAGTGGCAACCGCCCTGAACAA<br/> GATCCAGGATGTGGTGAATCAGCAGGGCAACTCTCTGAATCACCTGACCAGCCA<br/> GCTGAGACAGAACTTTCAGGCCATCAGCTCCTCTATCCAGGCCATCTACGACAG<br/> GCTGGACCCCCACAGGCAGACCAGCAGGTGGATAGACTGATCACAGGCAGGC<br/> TGGCCGCCCTGAACGTGTTCTGTGAGCCACACACTGACCAAGTATACCGAGGTGA<br/> GGGCATCTAGGCAGCTGGCACAGCAGAAGGTGAACGAGTGGTGAAGTCCCAG<br/> TCTAAGAGATACGGCTTTTGTGGCAATGGCACCCACATCTTCAGCCTGGTGAACG<br/> CAGCACCAGAGGGACTGGTGTTCCTGCACACAGTGCTGCTGCCACCCAGTACA<br/> AGGACGTGGAGGCATGGTCCGGACTGTGCGTGGATGGCATCAACGGCTACGTG<br/> CTGAGGCAGCCAAATCTGGCCCTGTATAAGGAGGGCAACTACTATCGCATCACC<br/> AGCCGGATCATGTTTGAGCCTAGAATCCCAACAATCGCCGACTTCGTGCAGATC<br/> GAGAACTGTAATGTGACCTTTGTAACATCAGCAGGTCCGAGCTGCAGACAATC<br/> GTGCCCGAGTACATCGACGTGAATAAGACCCTGCAGGAGCTGTCTACAAGCTG<br/> CCCAACTATACCGTGCCTGATCTGGTGGTGGAGCAGTATAACCAGACAATCCTG<br/> AATCTGACCAGCGAGATCTCCACACTGGAGAACAAGTCTGCCGAGCTGAATTAC<br/> ACCGTGCAGAAGCTGCAGACACTGATCGACAACATCAATAGCACACTGGTGGAT<br/> CTGAAGTGGCTGAACCGGGTGGAGACCGGATCCGGATACATCCCCGAGGCCCC<br/> CAGAGATGGCCAGGCCTACGTGCGGAAGGACGGCGAGTGGGTACTGCTGAGCA<br/> CATTCTGGGCAGATCCCTGGAGGTGCTGTTCCAGGGCCCAGGCCATCACCACC<br/> ATCACCACCATCATAGCGCCTGGTCCCACCCCCAGTTCGAGAAGGGCGGCGGTA<br/> GTGGAGGGGGCGGATCTGGCGGCTCAGCTTGGAGCCACCCCCAGTTCGAAAAG<br/> TGA</p> |
| HKU1 (S-2P) | <p>ATGTTTCTGATTATCTTTATTCTGCCACTACCCTGGCCGTCATTGGAGACTTCAA<br/> CTGCACTAACTCATTCAATTAACGACTACAACAAGACAATCCCCCGCATTTCGAG<br/> GATGTGGTTCGACGTGTCTCTGGGGCTGGGAACATACTATGTGCTGAATCGAGTC<br/> TATCTGAACACCACACTGCTGTTTACTGGATACTTCCCTAAATCCGGCGCCA<br/> TCCGCGACCTGGCTCTGAAGGGCTCAATCTACCTGAGCACCCTGTGGTACAAC<br/> CCCCTTTTCTGTGAGATTTCAACAATGGGATCTTTAGCAAGGTGAAGAACA<br/> GCTGTACGTCAACAACACCCTGTACTCTGAATTCAGTACAATCGTGATTGGATCT<br/> GTCTTTGTGAACACTAGTTATACCATCGTGGTCCAGCCTCACAATGGCATCCTGG<br/> AGATTACCGCCTGTGAGTATAAATGTGCGAATACCCACACACCGTGTGCAAGTC<br/> AAAAGGCAGCATTAGAAACGAGTCTGGCATATCGATAGCTCCGAACCCCTGTG<br/> CCTGTTTAAGAAAACTTACATAACAACGTGAGCGCCGACTGGCTGTATTTCCAC<br/> TTTTACCAGGAGAGGGGAGTGTCTATGCCTACTATGCTGATGTCGGCATGCCAA<br/> CTACCTTCTGTTTTCCCTGTACCTGGGCACAATTCTGTCTCATTACTATGTGATG<br/> CCCCTGACTTGAACGCCATCTCTAGTAACACCGACAATGAGACACTGGAATATT<br/> GGGTGACCCCTCTGTCCCGGAGACAGTACCTGCTGAACTTCGATGAGCACGGC</p>                                                                                                                                                                                                                                                                                                                                                                                                                                                                                                                                                                                                                                                                                                                                                                                                                                                                                                                                                                                                                                                                                                                                                                                                                                                                                                                                                                                                                                                                                                                                                     |

GTGATTACAAATGCTGTGCGACTGTTCAAGCTCCTTCCTGAGTGAAATCCAGTGCA  
AGACTCAGTCATTTGCACCTAACACCGGGGTGTATGATCTGTCTGGCTTCACCGT  
CAAACCAGTGGCCACTGTCTACAGGCGCATTCCAAACCTGCCGACTGTGATAT  
CGACAATTGGCTGAACAATGTCTCCGTGCCATCTCCCCTGAATTGGGAGCGACG  
GATCTTCAGCAACTGCAATTTCAACCTGTCAACTCTGCTGAGACTGGTCCATGTG  
GATTCATTAGCTGTAACAATCTGGACAAGAGCAAAATCTTTGGCTCCTGCTTCA  
ACTCTATTACCGTGGACAAGTTCGCCATCCCAAATAGAAGGCGCGACGATCTGC  
AGCTGGGGTCTAGTGGATTTCTGCAGTCAAGCAACTACAAGATCGATATTTCCCTC  
TAGTTCATGCCAGCTGTAATAAGCCTGCCACTGGTCAATGTGACCATCAACAAT  
TTCAATCCCAGCTCCTGGAACCGACGGTACGGCTTCGGGTCTTTAACCTGTCTA  
GTTATGATGTGGTCTACTCTGACCACTGTTTTAGTGTGAACTCAGATTTCTGTCT  
TGCGCAGACCCAAGTGTGGTCAATTCATGCGCCAAGAGCAAACCACCTCCGCT  
ATTTGTCCTGCAGGCACAAAGTATAGGCATTGCGATCTGGACACAACCTCTGTACG  
TGAAAACTGGTGTGCTGCAGCTGTCTGCCTGACCCAATCAGCACTTACTCCCC  
CAATACCTGCCCTCAGAAGAAAAGTGGTGGTGGGAATTGGCGAGCACTGTCTGG  
GCTGGGAATCAACGAGGAAAAGTGGGACCCAGCTGAATCATTCAAGCTGCTT  
CTGTTCCCCAGATGCCTTTCTGGGATGGTCTTTTCGACAGTTGATTTCAAACAAC  
AGGTGCAACATCTTTTCTAATTTTCACTTTAACGGGATTAATAGTGAACCACATG  
TTCAAACGATCTGCTGTACAGCAATACTGAGATCAGCACCGGCGTCTGCGTGAA  
CTATGACCTGTACGGGATCACAGGCCAGGGGATTTTCAAGGAAGTGAGCGCCCG  
TACTATAACAATTGGCAGAACCTGCTGTATGATAGCAATGGCAACATCATTGGG  
TTCAAGGACTTTCTGACCAACAAGACATATACTATCCTGCCCTGCTACTCTGGCA  
GAGTGAGTGCAGCCTTCTACCAGAACTCCTCTAGTCCTGCCCTGCTGTATAGGAA  
TCTGAAGTGTAGCTACGTGCTGAACAATATCAGCTTTATTTCCAGCCATTCTATT  
TTGACAGCTACCTGGGCTGCGTGTGAACGCTGTCAATCTGACCTCCTACAGCG  
TGAGCAGCTGTGATCTGAGAATGGGATCCGGCTTCTGCATTGACTATGCACTGC  
CATCCAGCGGGGGAGCGGAAGCGGAATCAGTTCACCATACAGGTTCTGTGACTT  
TTGAGCCCTTCAACGTGAGCTTCTGTGAACGACAGTGTGGAGACCGTCCGGCGGG  
CTGTTTGAATCCAGATTTCAACAAACTTCACTATTGCAGGCCACGAGGAGTTCA  
TCCAGACCAGCTCCCCAAAGTGACAATCGATTGTTACGCCTTCTGTCTGCAGCAA  
TTATGCTGCATGTCATGATCTGCTGAGCGAGTACGGAACTTTTTTCGACAAATATC  
AACAGCATTCTGAACGAAGTGAATGATCTGCTGGACATTACCAGCTGCAGGTG  
GCTAACGCACTGATGCAGGGCGTCACTGAGCTCTAATCTGAACACTAATCTGC  
ACAGCGATGTGGACAATATCGACTTCAAGAGCCTGCTGGGATGTCTGGGGTCCC  
AGTGCGGATCAAGCTCCCGCTCCCTGCTGGAGGATCTGCTGTTCAACAAGGTGA  
AACTGTCTGACGTGGGCTTTGTGAGGCCTACAACAATTGTACCGGAGGCAGCG  
AAATCCGGGATCTGCTGTGCGTGCAGAGCTTCAATGGCATCAAAGTCTGCCTC  
CAATTCTGTCCGAAACTCAGATCAGCGGGTATACTACCGCAGCTACCGTGGCAG  
CAATGTTCCACCTTGGAGCGCCGCAGCAGGAGTGCCCTTTTCCCTGAACGTCC  
AGTACCGCATCAATGGGCTGGGAGTGACCATGGACGTGCTGAACAAGAATCAGA  
AACTGATTGCCAACGCTTTCAATAAGGCTCTGCTGAGCATCCAGAACGGGTTTAC  
CGCAACAAATTCTGCACTGGCCAAAATCCAGAGTGTGCTGAACGCTAATGCACA  
GGCCCTGAACAGCCTGCTGCAGCAGCTGTTTAATAAGTTCGGAGCTATTTCTAGT  
TCACTGCAGGAGATCCTGTCTAGACTGGATCCCCCGAAGCACAGGTGCAGATC  
GACCGGCTGATTAACGGCAGACTGACCGCACTGAATGCCTACGTGTACAGCAG  
CTGAGCGATATCACCTGATCAAGGCTGGGGCAAGCCGAGCCATCGAGAAGGT  
GAACGAATGCGTGAAAAGTCAAGTCAACCCGGATTAATTTCTGCGGCAACGGGAA  
TCACATCCTGAGCCTGGTGCAGAACGCTCCTTATGGGCTGCTGTTTATCCATTT  
AGTTACAAGCCCACCAGCTTCAAGACTGTCTGCTGGTGTACCTGGACTGTGCCTG  
AGCGGAGATCGGGGCATTGCCCCCAAGCAGGGGTATTTTCATCAAACAGAACGAC  
TCCTGGATGTTTACAGGAAGCTCCTACTATTACCCCGAGCCTATCTCTGACAAGA  
ATGTCGTGTTTATGAACAGCTGCTCCGTGAACCTTACCAAAGCCCCCTTCTCTA  
CCTGAACAATAGCATCCCAAACCTGTCCGATTTTCGAGGCTGAACCTGTCTGTGG  
TTTAAGAATCACACCAGTATTGCCCTAACCTGACATTCAATAGCCATATCAACGC  
TACATTTCTGGACCTGTATTACGAGATGAACGTTATCCAGGAATCTATTAAGAGT  
TGAACAGCGGGCCGCTGGAGGTGCTGTTCCAGGGCCAGGCGGGTACATCCA

|                    |                                                                                                                                                                                                                                                                                                                                                                                                                                                                                                                                                                                                                                                                                                                                                                                                                                                                                                                                                                                                                                                                                                                                                                                                                                                                                                                                                                                                                                                                                                                                                                                                                                                                                                                                                                                                                                                                                                                                                                                                                                                                                                                                                                                                                                                                                                                                                                                                                                                                                                                                                                                                                                                                                                                                                                                                                                                                                                                                                                                                                                                                                                                                                                                                                                                                                                    |
|--------------------|----------------------------------------------------------------------------------------------------------------------------------------------------------------------------------------------------------------------------------------------------------------------------------------------------------------------------------------------------------------------------------------------------------------------------------------------------------------------------------------------------------------------------------------------------------------------------------------------------------------------------------------------------------------------------------------------------------------------------------------------------------------------------------------------------------------------------------------------------------------------------------------------------------------------------------------------------------------------------------------------------------------------------------------------------------------------------------------------------------------------------------------------------------------------------------------------------------------------------------------------------------------------------------------------------------------------------------------------------------------------------------------------------------------------------------------------------------------------------------------------------------------------------------------------------------------------------------------------------------------------------------------------------------------------------------------------------------------------------------------------------------------------------------------------------------------------------------------------------------------------------------------------------------------------------------------------------------------------------------------------------------------------------------------------------------------------------------------------------------------------------------------------------------------------------------------------------------------------------------------------------------------------------------------------------------------------------------------------------------------------------------------------------------------------------------------------------------------------------------------------------------------------------------------------------------------------------------------------------------------------------------------------------------------------------------------------------------------------------------------------------------------------------------------------------------------------------------------------------------------------------------------------------------------------------------------------------------------------------------------------------------------------------------------------------------------------------------------------------------------------------------------------------------------------------------------------------------------------------------------------------------------------------------------------------|
|                    | <p>GAGGCACCTCGAGACGGACAGGCTTATGTGAGAAAGGATGGAGAGTGGGTCTCT<br/> GCTGTCCACCTTCTGGGCCACCACCACCACCACCACCACCATCATAGCGCCTGGTC<br/> CCACCCCAAGTTCGAGAAGTGA</p>                                                                                                                                                                                                                                                                                                                                                                                                                                                                                                                                                                                                                                                                                                                                                                                                                                                                                                                                                                                                                                                                                                                                                                                                                                                                                                                                                                                                                                                                                                                                                                                                                                                                                                                                                                                                                                                                                                                                                                                                                                                                                                                                                                                                                                                                                                                                                                                                                                                                                                                                                                                                                                                                                                                                                                                                                                                                                                                                                                                                                                                                                                                                            |
| <p>NL63 (S-2P)</p> | <p>ATGAAGCTGTTCTGATCCTGCTGGTGCTGCCCTGGCCAGCTGCTTCTTTACCT<br/> GTAAGCTAATGCCAACCTGAGCATGCTGCAGCTGGGCGTGGCCGACAATAGCT<br/> CCACCATCGTGACAGGCTGCTGCCTACACACTGGTTCTGCGCCAACCAGAGCA<br/> CCAGCGTGTACTCCGCCAATGGCTTCTTTTATATCGATGTGGGCAACCACAGATC<br/> TGCCTTTGCCCTGCACACCGGCTACTATGACGCCAACCAGTACTATATCTACGTG<br/> ACAAATGAGATCGGCCTGAACGCCTCCGTGACCCTGAAGATCTGCAAGTTCTCTA<br/> GGAACACCACATTCGACTTTCTGAGCAATGCCTCTAGCTCCTTCGATTGTATCGT<br/> GAATCTGCTGTTTACCGAGCAGCTGGGAGCACCCTGGGAATCACCATCTCCGG<br/> CGAGACAGTGAGACTGCACCTGTACAACGTGACCCGGACCTTCTACGTGCCAGC<br/> AGCCTATAAGCTGACAAAGCTGAGCGTGAAGTGCTACTTCAATTATTCCTGCGTG<br/> TTCAGCGTGGTGAACGCCACCGTGACAGTGAATGTGACCACACACAACGGCCGC<br/> GTGGTGAATTACACAGTGTGCGACGATTGTAACGGCTATACCGACAATATCTTCA<br/> GCGTGCAGCAGGATGGCAGAATCCCAATGGCTTCCCCTTTAACAATTGGTTTCT<br/> GCTGACCAACGGCAGCACACTGGTGGATGGCGTGTCCAGACTGTATCAGCCCCT<br/> GAGGCTGACCTGCCTGTGGCCTGTGCCAGGCCTGAAGTCTAGCACCCTGCTCG<br/> TGTACTTTAATGCCACAGGCTCCGACGTGAATTGTAACGGCTACCAGCACAATC<br/> TGTGGTGGATGTGATGCGCTATAATCTGAACCTTCTCCGCCAATTCTCTGGACAAC<br/> CTGAAGTCTGGCGTGATCGTGTTCAAGACCCTGCAGTACGATGTGCTGTTTTATT<br/> GCAGCAACTCCTCTAGCGCGTGCTGGACACCACAATCCCATTCCGGCCCTCCT<br/> CTCAGCCTTACTACTGTTTCATCAACTCTACCATCAACACCACACACGTGAGCAC<br/> ATTCGTGGGCATCCTGCCACCTACCGTGCGCGAGATCGTGGTGGCAAGGACCG<br/> GCCAGTTTTACATCAATGGCTTCAAGTATTTTGACCTGGGCTTCATCGAGGCCGT<br/> GAACTTCAACGTGACCACAGCCTCCGCCACCGACTTCTGGACAGTGGCCTTCGC<br/> CACATTTGTGGATGTGCTGGTGAACGTGTCCGCCACCAATATCCAGAACCTGCT<br/> GTACTGCGATTCTCCTTTCGAGAAGCTGCAGTGTGAGCACCTGCAGTTTGGCCT<br/> GCAGGACGGCTTCTACAGCGCCAATTTCTGGACGATAATGTGCTGCCTGAGAC<br/> ATATGTGGCCCTGCCAATCTACTATCAGCACACCGATATCAATTTACCAGCCACA<br/> GCCAGCTTTGGCGGCTCCTGCTACGTGTGCAAGCCACACCAGGTGAACATCAGC<br/> CTGAATGGCAACACCTCCGTGTGCGTGAGAACAAGCCACTTCTCCATCAGATACA<br/> TCTATAACAGGGTGAAGAGCGGCTCCCAGGCGACAGCTCCTGGCACATCTACC<br/> TGAAGTCCGGCACCTGTCTTTCTCTTTTAGCAAGCTGAACAATTTCCAGAAGTTT<br/> AAGACCATCTGCTTCTACAGTGGAGGTGCCAGGCAGCTGTAATTTTCCCCTGG<br/> AGGCCACATGGCACTACACCAGCTATAAATCGTGGGCGCCCTGTACGTGACAT<br/> GGTCTGAGGGCAACAGCATCACCGGCGTGCCCTATCCCGTGAGCGGCATCAGA<br/> GAGTTCAGCAATCTGGTGTGAACAACGTGCACAAAGTACAACATCTACGATTACG<br/> TGGGCACCGGCATCATCAGGTCTAGCAACCAGTCCCTGGCCGGCGGCATCACC<br/> TACGTGTCCAATTCTGGCAACCTGCTGGGCTTCAAGAAGTGTGAGCACCAGCAAT<br/> ATCTTTATCGTGACACCTTGCAATCAGCCAGACCAGGTGGCCGTGTATCAGCAGA<br/> GCATCATCGGCGCCATGACAGCCGTGAACGAGTCCAGATACGGCCTGCAGAAC<br/> CTGCTGCAGCTGCCAATTTCTACTACGTGAGCAACGGCGGCAACAATTGCACC<br/> ACAGCCGTGATGACCTACTCCAATTTGGCATCTGTGCCGACGGCTCTCTGATC<br/> CCTGTGAGGCCACGCAATCCTCTGATAACGGCATCAGCGCCATCATCACAGCC<br/> AATCTGTCTATCCCAGCAACTGGACCACATCTGTGCAGGTGGAGTACCTGCAG<br/> ATCACCAGCACACCTATCGTGGTGGATTGCGCCACCTACGTGTGCAATGGCAAC<br/> CCAAGATGCAAGAATCTGCTGAAGCAGTACACCAGCGCCTGTAAGACAATCGAG<br/> GACGCACTGAGGCTGTCCGCCACCTGGAGACAAACGACGTGAGCTCCATGCT<br/> GACCTTCGATTCCAATGCCTTTTCTCTGGCCAACGTGACCTCCTTCGGCGATTAT<br/> AATCTGTCTAGCGTGCTGCCACAGCGGAACATCAGATCCTCTAGGATCGCAGGC<br/> AGGAGCGCCCTGGAGGACCTGCTGTTTTCCAAGGTGGTACCTCTGGCCTGGG<br/> CACAGTGGACGTGGATTACAAGTCTGCACCAAGGGCCTGTCTATCGCCGATCT<br/> GGCCTGTGCCAGTACTATAACGGCATCATGGTGTGCCAGGAGTGGCAGACG<br/> CAGAGCGCATGGCCATGTATACCGGCAGCCTGATCGGAGGAATGGTGTGGGA<br/> GGACTGACATCCGCCGACGAATCCCTTTCTCTCTGGCCCTGCAGGCCCGGCTG</p> |



|                    |                                                                                                                                                                                                                                                                                                                                                                                                                                                                                                                                                                                                                                                                                                                                                                                                                                                                                                                                                                                                                                                                                                                                                                                                                                                                                                                                                                                                                                                                                                                                                                                                                                                                                                                                                                                                                                                                                                                                                                               |
|--------------------|-------------------------------------------------------------------------------------------------------------------------------------------------------------------------------------------------------------------------------------------------------------------------------------------------------------------------------------------------------------------------------------------------------------------------------------------------------------------------------------------------------------------------------------------------------------------------------------------------------------------------------------------------------------------------------------------------------------------------------------------------------------------------------------------------------------------------------------------------------------------------------------------------------------------------------------------------------------------------------------------------------------------------------------------------------------------------------------------------------------------------------------------------------------------------------------------------------------------------------------------------------------------------------------------------------------------------------------------------------------------------------------------------------------------------------------------------------------------------------------------------------------------------------------------------------------------------------------------------------------------------------------------------------------------------------------------------------------------------------------------------------------------------------------------------------------------------------------------------------------------------------------------------------------------------------------------------------------------------------|
|                    | <p>AATTACGTGGCCCTGCAGACCGATGTGCTGCAGGAGAATCAGAAGATCCTGGCC<br/> GCCTCTTTCAACAAGGCCATCAACAATATCGTGGCCAGCTTTAGCTCCGTGAACG<br/> ATGCCATCACCCAGACAGCCGAGGCCATCCACACCGTGACAATCGCCCTGAATA<br/> AGATCCAGGACGTGGTGAACCAGCAGGGCAGCGCCCTGAATCACCTGACCTCC<br/> CAGCTGCGCCACAATTTCCAGGCCATCAGCAACTCCATCCAGGCCATCTACGAC<br/> AGGCTGGACCCCCACAGGCAGACCAGCAGGTGGATAGGCTGATCACCGGCCG<br/> GCTGGCCGCCCTGAACGCCTTCGTGAGCCAGGTGCTGAATAAGTATACAGAGGT<br/> GCGCGGCAGCCGGAGACTGGCACAGCAGAAGATCAACGAGTGCGTGAAGTCTC<br/> AGAGCAACCCGTACGGCTTCTGTGGCAATGGCACCCACATCTTTAGCATCGTGA<br/> ATTCCGCCCCAGACGGCCTGCTGTTCTGCACACCGTGCTGCTGCCACAGATT<br/> ATAAGAACGTGAAGGCCTGGAGCGGCATCTGCGTGGACGGCATCTACGGCTATG<br/> TGCTGCGCCAGCCTAACCTGGTGTGTACAGCGATAATGGCGTGTTCGCGTGA<br/> CCTCCCGGATCATGTTTCAGCCAGACTGCCTGTGCTGAGCGACTTCGTGCAGA<br/> TCTATAACTGTAACGTGACATTTGTGAACATCTCCAGGGTGGAGCTGCACACCGT<br/> GATCCCTGACTACGTGGATGTGAACAAGACTGCAGGAGTTTGCCGAGAACCT<br/> GCCAAGTACGTGAAGCCTAATTTGACCTGACCCCTTCAACCTGACATATCTG<br/> AATCTGTCTAGCGAGCTGAAGCAGCTGGAGGCCAAGACCCCTCCCTGTTCCAG<br/> ACCACAGTGGAGCTGCAGGGCCTGATCGACCAGATCAACTCTACATACGTGGAT<br/> CTGAAGCTGCTGAATCGGTTTGAGAACGGATCCGGATACATCCCGAGGCCCCC<br/> AGAGATGGCCAGGCCTACGTGCGGAAGGACGGCGAGTGGTACTGCTGAGCAC<br/> ATTCCTGGGCAGATCCCTGGAGGTGCTGTTCCAGGGCCCAGGCCATCACCACCA<br/> TCACCACCATCATAGCGCCTGGTCCCACCCCAAGTTTCGAGAAGGGCGGGCGTA<br/> GTGGAGGGGGCGGATCTGGCGGCTCAGCTTGGAGCCACCCCAAGTTTCGAAAAG<br/> TGA</p>                                                                                                                                                                                                                                                                                                                                                                                                                                                                                                                                               |
| <p>OC43 (S-2P)</p> | <p>ATGTTCTGATCCTGCTGATCAGCCTGCCTACCGCCTTTGCCGTGATCGGGCAG<br/> CTGAAGTGCCCACTGGATAGCCGGACAGGCTCCCTGAACAATATCGACACCGGC<br/> CCCCCTTCCATCTCTACCGCCACAGTGGATGTGACAAATGGCCTGGGCACCTAC<br/> TATGTGCTGGACAGGGTGTATCTGAATACCACACTGTTCTGAACGGCTACTATC<br/> CCACCAGCGGCTCCACATACCGCAACATGGCCCTGAAGGGCACAGATAAGCTGT<br/> CCACCCTGTGGTTAAGCCACCCTTCTGTCTGACTTTATCAATGGCATCTTCGC<br/> CAAGGTGAAGAACACCAAGGTGTTAAGGATGGCGTGATGTATTCTGAGTTCCCC<br/> GCCATCACCATCGGCAGCACATTTGTGAACACCTTTACAGCGTGGTGGTGCAG<br/> CCTAGGACAATCAATTCTACCCAGGACGGCGTGAACAAGCTGCAGGGCCTGCTG<br/> GAGGTGAGCGTGTGCCAGTATAATATGTGCGAGTACCCCCACACAATCTGCCAC<br/> CCTAAGCTGGGCAACCACTTCAAGGAGCTGTGGCACATGGATACCGGCGTGGT<br/> TCTGTCTGTATAAGCGCAACTTACCTACGACGTGAACGCCACCTATCTGACT<br/> TCCACTTTTACCAGGAGGGCGGCACATTCTATGCCTACTTTACCGATACAGGCGT<br/> GGTGACCAAGTTCCTGTTCAACGTGTACCTGGGCATGGCCCTGAGCCACTACTA<br/> TGTGATGCCACTGACATGCATCTCCCGGAGAGATATCGGCTTACCCTGGAGTA<br/> TTGGGTGACCCCTGACATCCCGGCAGTACCTGCTGGCCTTCAATCAGGACGG<br/> CATCATCTTTAACGCCGTGGACTGCATGTCTGACTTCATGAGCGAGATCAAGTGT<br/> AAGACACAGAGCATCGCCCTCCAACCGCGTGTATGAGCTGAACGGCTACACC<br/> GTGCAGCCCATCGCCGACGTGTACAGGGCGCAAGCCAGATCTGCCAAGTCAAT<br/> ATCGAGGCCTGGCTGAATGACAAGTCCGTGCCCTCTCCTCTGAACTGGGAGAGA<br/> AAGACCTTCAGCAACTGTAACCTCAACATGAGCTCCCTGATGTCTTTCATCCAGG<br/> CCGACAGCTTTACATGCAACAATATCGATGCCGCAAGATCTACGGCATGTGCTT<br/> CTCTAGCATCACCATCGACAAGTTTGCCATCCCTAACGGCCGGAAGGTGGATCT<br/> GCAGCTGGGCAATCTGGGCTATCTGCAGTCTTTCAACTACAGAATCGATACCACA<br/> GCCACAAGCTGCCAGCTGTAATAATCTGCCAGCCGCCAACGTGTCCGTGTCT<br/> CGTTCAATCCCTCCACCTGGAACAAGAGATTGGCTTTATCGAGAATAGCGTGT<br/> TCAAGCCACAGCCAGCAGGCGTGTGACAAACCACGACGTGGTGTACGCCAG<br/> CACTGTTTCAAGGCCCAAGAATTTTTGCCCTGTAAGCTGAACTCCTCTCTGT<br/> GCGTGGGCTCCGGACCAGGCAAGAACAATGGCATCGGCACCTGTCCCGCCGGC<br/> ACAACTATCTGACCTGCCACAACCTGTGCAACCCTGATCCAATCACCTTCACAG<br/> GCCCTACAAGTGCCCTCAGACCAAGAGCCTGGTGGGAATCGGAGAGCACTGC<br/> TCCGGACTGGCCGTGAAGTCTGACTACTGTGCGGCAATCCTTGCACATGTGAG</p> |

|              |                                                                                                                                                                                                                                                                                                                                                                                                                                                                                                                                                                                                                                                                                                                                                                                                                                                                                                                                                                                                                                                                                                                                                                                                                                                                                                                                                                                                                                                                                                                                                                                                                                                                                                                                                                                                                                                                                                                                                                                                                                                                                                                                                                                                                                                                                                                                                                                                                                                                                                                                                                                                                                                                                                                       |
|--------------|-----------------------------------------------------------------------------------------------------------------------------------------------------------------------------------------------------------------------------------------------------------------------------------------------------------------------------------------------------------------------------------------------------------------------------------------------------------------------------------------------------------------------------------------------------------------------------------------------------------------------------------------------------------------------------------------------------------------------------------------------------------------------------------------------------------------------------------------------------------------------------------------------------------------------------------------------------------------------------------------------------------------------------------------------------------------------------------------------------------------------------------------------------------------------------------------------------------------------------------------------------------------------------------------------------------------------------------------------------------------------------------------------------------------------------------------------------------------------------------------------------------------------------------------------------------------------------------------------------------------------------------------------------------------------------------------------------------------------------------------------------------------------------------------------------------------------------------------------------------------------------------------------------------------------------------------------------------------------------------------------------------------------------------------------------------------------------------------------------------------------------------------------------------------------------------------------------------------------------------------------------------------------------------------------------------------------------------------------------------------------------------------------------------------------------------------------------------------------------------------------------------------------------------------------------------------------------------------------------------------------------------------------------------------------------------------------------------------------|
|              | <p>CCACAGGCCTTCCTGGGATGGAGCGCCGACTCCTGCCTGCAGGGCGATAAGTG<br/> TAATATCTTTGCCAACCTGATCCTGCACGATGTGAACTCTGGCCTGACCTGCAGC<br/> ACAGACCTGCAGAAGGCCAATACCGATATCAAGCTGGGCGTGTGCGTGAACCTAT<br/> GACCTGTATGGCATCTCCGGCCAGGGCATCTTCGTGGAAGTGAATGCCACATAC<br/> TATAATTCCTGGCAGAACCTGCTGTACGACTCTAATGGCAACCTGTATGGCTTCA<br/> GGGATTACATACCAATCGGACCTTCATGATCAGATCTTGCTATAGCGGACGCGT<br/> GAGCGCCGCATTCCACGCAAACAGCTCCGAGCCTGCCCTGCTGTTGAGGAATAT<br/> CAAGTGCAACTACGTGTTTAAACAATTCCCTGATCCGCCAGCTGCAGCCAATCAAC<br/> TATTTTGATTCTTACCTGGGCTGCGTGGTGAATGCCTACAACAGCACCCGCATCT<br/> CTGTGCAGACATGCGACCTGACCGTGGGCTCCGGCTATTGCGTGGATTACTCCA<br/> AGAATCGGAGATCTAGGCGCGCCATCACACAGGCTACAGGTTCAAAACTTTG<br/> AGCCTTTCACCGTGAATAGCGTGAACGACTCCCTGGAGCCTGTGGGCGGCCTGT<br/> ATGAGATCCAGATCCCAAGCGAGTTCACCATCGGCAACATGGAGGAGTTTATCC<br/> AGACATCTAGCCCAAAGGTGACCATCGACTGCGCAGCCTTCGTGTGCGGCGATT<br/> ATGCCGCTGCAAGTCTCAGCTGGTGGAGTACGGCAGCTTTTGTGATAATATCAA<br/> CGCCATCCTGACCGAAGTGAATGAGCTGCTGGACACCACACAGCTGCAGGTG<br/> CCAATAGCCTGATGAACGGCGTGACCCTGTCCACAAAGCTGAAGGACGGCGTGA<br/> ATTTCAACGTGGACGATATCAACTTTTCTCTGTGCTGGGCTGCCTGGGCTCCGA<br/> GTGTTCTAAGGCAAGCTCCCGGAGCGCCATCGAGGACCTGCTGTTGATAAAGT<br/> GAAGCTGTCCGATGTGGGCTTTGTGGCCGCTATAACAATTGCACCGGCGGCGC<br/> CGAGATCAGAGACCTGATCTGCGTGCAGAGCTACAAGGGCATCAAGGTGCTGCC<br/> CCCTCTGCTGAGCGAGAACCAGATCTCCGGCTATACTGGCAGCCACCAGCGC<br/> CTCCCTGTTCCACCATGGACAGCAGCAGCAGGCGTGCCCTTTTATCTGAATGT<br/> GCAGTACCGCATCAACGGCCTGGGCGTGACCATGGACGTGCTGTCCCAGAATCA<br/> GAAGCTGATCGCCAACGCCTTCAACAATGCCCTGGACGCCATCCAGGAGGGCTT<br/> TGATGCCACCAATAGCGCCCTGGTGAAGATCCAGGCCGTGGTGAATGCCAACGC<br/> CGAGGCCCTGAACAATCTGCTGCAGCAGCTGTCCAACCGGTTCCGGCGCCATCTC<br/> TAGCTCCCTGCAGGAGATCCTGTCTAGACTGGACCCTCCAGAGGCCGAGGCCCA<br/> GATCGATAGGCTGATCAATGGCCGCTGACAGCCCTGAACGCCTACGTGAGCCA<br/> GCAGCTGTCTGATAGCACCTGGTGAAGTTCCTCCGCCGCCAGGCCATGGAGAA<br/> AGTGAATGAGTGCGTGAAGTCTCAGTCTAGCCGATCAACTTTTGTGGCAATGG<br/> CAACCACATCATCAGCCTGGTGCAGAACGCCCATATGGCCTGTACTTTATCCAC<br/> TTCTCTTATGTGCCACAAAGTACGTGACCGCCAAGGTGAGCCCTGGACTGTGC<br/> ATCGCAGGCGACAGAGGAATCGCACCAAGAGCGGCTATTTTCGTGAATGTGAAC<br/> AATACATGGATGTACACCGGCTCCGGCTACTATTACCCCGAGCCTATCACCGAG<br/> AACAAATGTGGTGGTCATGTCCACATGTGCCGTGAACTATACCAAGGCCCTTAC<br/> GTGATGCTGAATACCTCTACACCTAACCTGCCAGACTTCAGGGAGGAGCTGGAT<br/> CAGTGGTTAAGAATCAGACAAGCGTGGCCCTGACCTGTCCCTGGATTACATCA<br/> ACGTGACCTTTCTGGACCTGCAGGTGGAGATGAATCGCCTGCAGGAGGCCATCA<br/> AGGTGCTGAACGGATCCGGATACATCCCCGAGGCCCCAGAGATGGCCAGGCC<br/> TACGTGCGGAAGGACCGGAGTGGGTAAGTCTGCTGAGCACATTCCTGGCCAGAT<br/> CCTGGAGGTGCTGTTCCAGGGCCAGGCCATCACACCATCACCCATCATAG<br/> CGCCTGGTCCCACCCCAAGTTCGAGAAGGGCGGCGGTAGTGGAGGGGGCGGA<br/> TCTGGCGGCTCAGCTTGGAGCCACCCCAAGTTCGAAAAGTGA</p> |
| WIV-1 (S-2P) | <p>ATGAAACTGCTGGTGTGCTGGTCTTTGCCACACTGGTCTCATCCTACACTATTGAAA<br/> AATGCCTGGACTTTGACGACAGAACTCCCCCGCCAACACCCAGTTTCTGAGCT<br/> CCCACCGGGGCGTGTACTATCCAGACGATATCTTCAGATCCAACGTGCTGCACC<br/> TGGTGCAGGATCACTTCCTGCCCTTTGACTCTAATGTGACAAGATTCATCACCTTT<br/> GGCCTGAATTTGACAACCCATCATCCCATTCAAGGATGGCATCTACTTTGCCG<br/> CCACAGAGAAGTCTAACGTGATCCGGGGCTGGGTGTTTGGCAGCACCATGAACA<br/> ATAAGTCTCAGAGCGTGATCATCATGAACAATAGCACCAACCTGGTTCATCAGAGC<br/> CTGCAATTTGAGCTGTGCGACAACCCCTTCTTTGTGGTGTGAAGTCCAACAAT<br/> ACACAGATCCCTTCTTATATCTTTAACAATGCCTTCAACTGCACCTTTGAGTACGT<br/> GAGCAAAGACTTCAACCTGGACCTGGGCGAGAAGCCAGGCAACTTCAAGGACCT<br/> GCGGGAGTTCGTGTTTAGAAACAAGGATGGCTTCCTGCACGTGTATTCCGGCTA<br/> CCAGCCAATCTCCGCCGATCTGGCCTGCCAACAGGCTTCAATGCCCTGAAGCC</p>                                                                                                                                                                                                                                                                                                                                                                                                                                                                                                                                                                                                                                                                                                                                                                                                                                                                                                                                                                                                                                                                                                                                                                                                                                                                                                                                                                                                                                                                                                                                                                                                                                                                                                                                                                                                                                                                                                                                                                |

CATCTTTAAGCTGCCTCTGGGCATCAATATCACCAACTTCAGGACACTGCTGACC  
GCATTTCCACCTCGCCCCGACTATTGGGGCACAAGCGCCGCAGCCTATTTCTGTG  
GGCTACCTGAAGCCTACCACCTTCATGCTGAAGTACGATGAGAACGGCACAATC  
ACCGACGCCGTGGATTGCTCCCAGAATCCTCTGGCCGAGCTGAAGTGTAGCGTG  
AAGTCCTTTGAGATCGACAAGGGCATCTATCAGACCAGCAACTTTTCGGGTGGCC  
CCATCCAAGGAGGTGGTGAGATTCCCTAATATCACAAACCTGTGCCATTTCGGC  
GAGGTGTTTAATGCCACCACATTCCCAGCGTGTACGCCTGGGAGCGGAAGAGA  
ATCTCTAACTGCGTGGCCGATTATAGCGTGTGTACAATTCCACATCTTTTCAGCA  
CCTTTAAGTGCTATGGCGTGTCCGCCACCAAGCTGAATGACCTGTGCTTCTCTAA  
CGTGTACGCCGATAGCTTTGTGGTGAAGGGCGACGATGTGAGGCAGATCGCAC  
CTGGACAGACCGGCGTGTATCGCAGACTACAATAAGCTGCCAGACGATTTCA  
CAGGCTGCGTGTGGCCTGGAATACCCGCAACATCGATGCCACACAGACCGGC  
AACTACAATTATAAGTACAGGAGCCTGAGGCACGGCAAGCTGAGGCCTTTTCGAG  
CGCGACATCTCCAACGTGCCCTTTTCTCCTGATGGCAAGCCTTGACCCCCACCC  
GCCTTTAATTGTTACTGGCCACTGAACGACTATGGCTTCTACATCACAAATGGCA  
TCGGCTATCAGCCATACAGGGTGGTGGTGCTGAGCTTCGAGTGTGACTGAAACGCAC  
CAGCAACAGTGTGCCGACCAAAGCTGTCCACCGATCTGATCAAGAATCAGTGCG  
TGAACCTCAACTTCAACGGCCTGACAGGCACCGGCGTGTGACCCCTCTAGCA  
AGAGGTTCCAGCCTTTTCAGCAGTTCGGCCGCGACGTGAGCGATTTTCACAGACT  
CCGTGCGCGACCCTAAGACCTCCGAGATCCTGGATATCTCTCCATGCAGCTTTG  
GCGGCGTGTCTGTGATCACCCCCGGCACAACACCTCCTCTGAGGTGGCCGTG  
CTGTACCAGGATGTGAATTGTACAGACGTGCCAGTGGCAATCCACGCAGACCAG  
CTGACCCCTTCTTGGCGGGTGCACAGCACAGGCAACAACGTGTTCCAGACCCAG  
GCAGGATGCCTGATCGGAGCAGAGCACGTGGATAACAGCTATGAGTGCGACATC  
CCTATCGGCGCCGGCATCTGTGCCTCCTACCACACAGTGAGCTCCCTGAGATCC  
ACCTCTCAGAAGTCCATCGTGGCCTATACCATGTCTCTGGGCGCCGATTCTAGCA  
TCGCCTACAGCAACAATAAATCGCCATCCCAACCAACTTTAGCATCTCCATCAC  
CACAGAAGTGATGCCCGTGTCCATGGCCAAGACATCTGTGGACTGCAACATGTA  
TATCTGTGGCGATTCCACCGAGTGCGCCAATCTGCTGCTGCAGTACGGCTCCTT  
CTGTACACAGCTGAACAGGGCCCTGTCTGGAATCGCAGTGGAGCAGGACCCGGA  
ATACCAGAGAGGTGTTTCGCCAGGTGAAGCAGATGTACAAGACACCTACCCTGA  
AGGACTTTGGCGGCTTCAACTTTTCTCAGATCCTGCCAGATCCCCTGAAGCCAAC  
AAAGCGGAGCTTCATCGAGGACCTGCTGTTAATAAGGTGACCCTGGCCGATGC  
CGGCTTCATGAAGCAGTATGGCGAGTGCCTGGGCGATATCAACGCCCGGGACC  
TGATCTGTGCCCAGAAGTTTAATGGCCTGACAGTGTGCCTCCACTGCTGACCG  
ACGATATGATCGCAGCATAACAGCCGCCCTGGTGAAGCGGCACAGCAACCGCA  
GGATGGACCTTTGGCGCAGGAGCCGCCCTGCAGATCCCCTTCGCCATGCAGAT  
GGCCTATCGGTTTAACGGCATCGGCGTGACCCAGAATGTGCTGTACGAGAACCA  
GAAGCAGATCGCCAATCAGTTCAACAAGGCCATCAGCCAGATCCAGGAGTCCCT  
GACCACAACCTCTACCGCCCTGGGCAAGCTGCAGGACGTGGTGAATCAGAACG  
CCCAGGCCCTGAATAACTGTTGAGCAGTGTCCCTCTAACTTCGGCGCCATCA  
GCTCCGTGCTGAATGATATCCTGTCCAGACTGGACCCCTGAGGCAGAGGTGC  
AGATCGATAGGCTGATCACCGGCCGCTGCAGTCTCTGCAGACATATGTGACCC  
AGCAGCTGATCAGGGCAGCAGAGATCAGAGCAAGCGCCAACCTGGCCGCCACA  
AAGATGAGCGAGTGCCTGCTGGGCCAGTCCAAGAGGGTGGACTTCTGTGGCAA  
GGGCTATCACCTGATGTCCTTTCTCAGGCAGCACCACACGGAGTGGTGTTCCT  
GCACGTGACCTACGTGCCATCTCAGGAGCGCAACTTTACAACCGCACCAGCAAT  
CTGCCACGAGGGCAAGGCCTACTTCCCAGGGAGGGCGTGTTCGTGTTTAACG  
GCACAAGCTGGTTTATCACCCAGCGCAATTTCTTTTCCCCTCAGATCATCAAC  
CGACAATACATTTCGTGTCTGGCAGCTGTGACGTGGTTCATCGGCATCATCAACA  
ACCGTGTATGATCCACTGCAGCCGAGCTGGACTCTTTCAAGGAGGAGCTGGAT  
AAGTACTTTAAGAACCACACCAGCCCCGACGTGGATCTGGGCGACATCAGCGGC  
ATCAATGCCTCCGTGGTGAACATCCAGAAGGAGATCGATCGCCTGAATGAGGTG  
GCTAAGAACCTGAATGAGTCTCTGATTGACCTGCAGGAACCTGGGCAAGTATGAA  
CAGGGATCCGGATACATCCCCGAGGCCCCAGAGATGGCCAGGCCTACGTGCG  
GAAGGACGGCGAGTGGTACTGCTGAGCACATTCTGGGCAGATCCCTGGAGG

|                |                                                                                                                                                                                                                                                                                                                                                                                                                                                                                                                                                                                                                                                                                                                                                                                                                                                                                                        |
|----------------|--------------------------------------------------------------------------------------------------------------------------------------------------------------------------------------------------------------------------------------------------------------------------------------------------------------------------------------------------------------------------------------------------------------------------------------------------------------------------------------------------------------------------------------------------------------------------------------------------------------------------------------------------------------------------------------------------------------------------------------------------------------------------------------------------------------------------------------------------------------------------------------------------------|
|                | TGCTGTTCCAGGGCCCAGGCCATCACCACCATCACCACCATCATAGCGCCTGGT<br>CCCACCCCAGTTTCGAGAAGGGCGGCGGTAGTGGAGGGGGCGGATCTGGCGG<br>CTCAGCTTGGAGCCACCCCAGTTTCGAAAAGTGA                                                                                                                                                                                                                                                                                                                                                                                                                                                                                                                                                                                                                                                                                                                                                   |
| Fc $\alpha$ R  | GAATTCGCCACCATGGACCCCAAGCAGACCACCCTGCTGTGCCTGGTGTGTGT<br>CTGGGCCAGAGAATCCAGGCCCAGGAAGGCGACTTCCCCATGCCCTTCATCAGC<br>GCCAAGAGCAGCCCCGTGATCCCCCTGGATGGCAGCGTGAAGATCCAGTGCCA<br>GGCCATCAGAGAGGCCCTACCTGACCCAGCTGATGATCATTAAAGAACAGCACCTA<br>CCGCGAGATCGGCAGACGGCTGAAGTTCTGGAACGAGACAGACCCCGAGTTCTG<br>TGATCGACCACATGGACGCCAACAAGGCCGGCAGATACCAGTGTGAGTACCGGA<br>TCGGCCACTACCGGTTCCGGTACAGCGACACCCTGGAAGTGGTCGTGACCGGC<br>CTGTACGGCAAGCCTTTCCTGAGCGCCGATCGGGGACTGGTGCTGATGCCCGG<br>CGAGAACATCAGCCTGACCTGTAGCAGCGCCACATCCCCTTCGACAGATTAG<br>CCTGGCCAAAGAGGGCGAGCTGAGCCTGCCTCAGCATCAGTCTGGCGAGCACC<br>CCGCCAACTTTAGCCTGGGCCCTGTGGACCTGAACGTGTCCGGCATCTACCGGT<br>GCTACGGCTGGTACAACCGGTCCCCCTACCTGTGGTCCTTCCCCAGCAACGCTC<br>TGGAAGTGGTCGTGACAGACAGCATCCACCAGGACTACACCACCCAGAATGGCG<br>GCGGAGGATCTGGCGGAGGCGGAAGTGGCGGAGGGGGCTCTGGACTGAACGA<br>CATCTTCGAGGCCCGAGAAAATCGAGTGGCACGAGCACCACCACCATCACCCTG<br>ACTCGAG |
| Fusion peptide | LCBiot-SKPSKRSEFIEDLLFNKVTLADAGFIKQYGD                                                                                                                                                                                                                                                                                                                                                                                                                                                                                                                                                                                                                                                                                                                                                                                                                                                                 |

**Supplementary Table 4.** Sample Dilutions in the Fc Array Assay

| <b>Sample Type</b> | <b>Dilution</b> | <b>Detection Reagent</b>                                                                                                                                                  |
|--------------------|-----------------|---------------------------------------------------------------------------------------------------------------------------------------------------------------------------|
| Serum              | 1:5000          | anti-human IgG,<br>Fc $\gamma$ R2A, Fc $\gamma$ R2B,<br>Fc $\gamma$ R3A, Fc $\gamma$ R3B                                                                                  |
| Serum              | 1:1000          | anti-human IgG1                                                                                                                                                           |
| Serum              | 1:250           | anti-human IgA,<br>anti-human IgA1,<br>anti-human IgA2,<br>anti-human IgD,<br>anti-human IgM,<br>anti-human IgG2<br>anti-human IgG3,<br>anti-human IgG4,<br>Fc $\alpha$ R |
| Nasal              | 1:10            | All detections                                                                                                                                                            |
| Stool              | 1:10            | All detections                                                                                                                                                            |
